# Supplementary material for: Differential human antibody repertoires following Zika infection and the implications for serodiagnostics and disease outcome
Source: PubMed Central journal article supplement (PMC6486612; doi:10.1038/s41467-019-09914-3), 2019-04-26
Supplement: 41467_2019_9914_MOESM1_ESM.pdf [file 41467_2019_9914_MOESM1_ESM.pdf]

## **Supplementary Information**

### **Differential human antibody repertoires following Zika infection and the implications for Serodiagnostics and disease outcome**

Ravichandran et al

10 20 30 40 50 60 70 80 90 100 110 120  
MKNPKKKSGGFRIVNMLKRGVARVSPFGLKRLPAGLLGHGPIRMVLAIALFRFTAICPKSLGLINRWSSVGKKEAMEI IKFKKDLAAMLRI INARKEKRRGADTSVIGVLLLTAA  
----->  
130 140 150 160 170 180 190 200 210 220 230 240  
MAAEVTRRGSAYYMIDLRNDAGEAISPTTLGMNKCYIQIMDLGHMCDATMSYECPMLDEGEVDPDVCWCNNTTSTWVVYGTCHHKKGEARRSRRRAVTLPSHSTRKQLQTRSQTWLESREY  
----->  
PR -----> M ----->  
250 260 270 280 290 300 310 320 330 340 350 360  
TKHLIRVENWIFRNFPGALAAAAIAWLLGSSSTSQKVIVLVMILLIAPAYSIIRCIGVSNRDFVEGMGGTWVDVLEHGGCVTVMAQDKP TVDIELVTTTVSNMAEVRSYCYEASISDMAS  
----->  
M -----> E ----->  
370 380 390 400 410 420 430 440 450 460 470 480  
DSRCPQGEAYLDKQSDTQYVCKRTLVDGRGWNGCGLFGKSLVTCAKFACSKIKMTGKSLQFENLEYRIML SVHGSQHSQSMIVNDTGHE DENRAKVEITPNSPRAEATLGGFGLSLGDC  
----->  
E ----->  
490 500 510 520 530 540 550 560 570 580 590 600  
EPRFTGLDFSDLYLTMNKHMLVHKEMFHDIPLPWHAGADTGTPHWNKKEALVEFKDAHAKRQTVVVLGSGQEGAVHTALAGALEAEMDGAAGRLSSGHLKCKRLKMDKLRKLVGSYSLCTA  
----->  
E ----->  
610 620 630 640 650 660 670 680 690 700 710 720  
AFTFTKIPAEHLHGTVTVVEVQAGTDGPKCKVPAQMAVDMQTLTPVGRLLITANPVITESTENSKMMLLEDPPFGDSYIVIGVGEKKITHHWRSGSTIGKAFEAETVRGAKRMAVLGDATWD  
----->  
E ----->  
730 740 750 760 770 780 790 800 810 820 830 840  
FGSVGGLNSLKGKIQHIFGAAFKSLFGGMSWFSQLIGTLLMMLGKNTKNGSISLMCLALGGVIFLSTAVSADVGCSDVDFSKKE TRCGTGFFVYNDVEAWRDRYKYHPDSPRRLAAAV  
----->  
E ----->  
NS1 ----->  
850 860 870 880 890 900 910 920 930 940 950 960  
KQAWEDGICGIISSVSRMNIEMR SVEGELNAILEENGQLTVVVGSVKNPMMRGPQLRFPVNPHELPHGWKAWGKSYFVRAAKTNNSFVVDGDTLKECPKHKRAWNSFLVEDHGFVHTS  
----->  
NS1 ----->  
970 980 990 1000 1010 1020 1030 1040 1050 1060 1070 1080  
VMLKRVREYSLCEDPVAIGTAVKGEKAVHSDLGYWIESEKNDTWRLKRAHLIEMKTCWPKSHTLWDGIEESDLIIPKSLAGPLSHHNTREGYRTQMKGPWHSEELIRFEECPGTVKH  
----->  
NS1 ----->  
1090 1100 1110 1120 1130 1140 1150 1160 1170 1180 1190 1200  
VEETCGTRGSLRSTTASGRVIEEWCCRECTMPPLSFRAKDGCWYGMIEIRPKPEENLRSVVTAGSTDHMDHFSLGVLVILLMVQEGKPKRMTKIIISTSMALVAMILGGFSMSDL  
----->  
NS1 ----->  
NS2A ----->  
1210 1220 1230 1240 1250 1260 1270 1280 1290 1300 1310 1320  
AKLAI LMGATFAEMNTGGDVAHLALIAAFKVRPALVLSVIFRANWTPRESMLLALASCLLQTAISALEGDL MVLINGFALAWLAIRAHVPR TDNITLAI LALPLARGLTLVAVRAGL  
----->  
NS2A ----->  
1330 1340 1350 1360 1370 1380 1390 1400 1410 1420 1430 1440  
ATCGGFMLLSLKGGKSVKKNLPEVMLGLTAVRLVDPINVVGLLLLTRSGKRSWPPSEVLTAVALICALAGGFAKAD IEMAGPMAAVGLLIVSYVVS GKSVDMYIERAGDITWEEKDAEVT  
----->  
NS2A ----->  
NS2B ----->  
1450 1460 1470 1480 1490 1500 1510 1520 1530 1540 1550 1560  
GNSPRLDVALDESDFSLVEDDGPMPREIILKVVLMTCGMNPIAIPFAAGAAWYVYVKTGKRSGALWDVVPAPKEVHKGETTDGVYRVHTRRLLGSTQVGVGMQGEVFTMHWVTKGSL  
----->  
NS2B ----->  
NS3 ----->  
1570 1580 1590 1600 1610 1620 1630 1640 1650 1660 1670 1680  
RSGEGLRDPYMGDVKQDLVSYCGPWKLDAAWDGHSVEQLLAVPGERARNIQTLPGFIPKTKDGDII GAVALDYPAFTSGSPILDKCGRVI GLYGNVVIKNGSYVAITDGRREEETPVEC  
----->  
NS3 ----->  
1690 1700 1710 1720 1730 1740 1750 1760 1770 1780 1790 1800  
FEP SMLKQKQLTVL DHPGAGKTRRVLPEIVREAIKTRLRVILAPTRVVAEMEEALRGLPVRMYMTAVNVTHSGTEIVDLMCHAFTSRLQLPVRVFNLYIMDEAHFTDPSIAAR  
----->  
NS3 ----->  
1810 1820 1830 1840 1850 1860 1870 1880 1890 1900 1910 1920  
GYISTRVEMGEAAAIFMTATPPGTRDAFFDSNSPIHDTIEVEVPERAWSGDFWVTDHSGKTVWFVPSVRNGNEIAACLTAKAGKRVILQSRKTFEFETQKTKHQEVDVFTDITISEGANF  
----->  
NS3 ----->  
1930 1940 1950 1960 1970 1980 1990 2000 2010 2020 2030 2040  
KADRVIDSRCLKPVIDGGERVTLAGPMPVTHASAAQRGRIGRPNFKPGDEYLYGGCAETDEDHAHMLEARMLLDNIYLDGLIASLYRPEADKVAATIEGFEKLRTEQRKTFVELNKR  
----->  
NS3 ----->  
2050 2060 2070 2080 2090 2100 2110 2120 2130 2140 2150 2160  
GDLPVMLAYQVASAGITVDRRCDFDTNTIMEDSVPAEVT RHGKRVLPKRWMDARVCSDHAALKSFKEFAAGKRGAAFGVMEALGTLPGHHTERFQEAIDNLAHLRAETGSRPY  
----->  
NS3 ----->  
NS4A ----->  
2170 2180 2190 2200 2210 2220 2230 2240 2250 2260 2270 2280  
KAAAALPETLETIMHLLGLLSTVSLGIFVFLMRNKGIKMGFGMVTLGASAWLMLSEIEPARIACVLIVVFLLLVVLPEPEKQRSPQDNQMAITIIIMAVGLLGLITANELGWLERTKS  
----->  
NS4A ----->  
2290 2300 2310 2320 2330 2340 2350 2360 2370 2380 2390 2400  
DLSHLHGRREEGATIGFSMDIDL RPA SAAWIAIYAALTFITPAVQHAVTTSYNNYSLMAATAGQVFLGKMGKMPFYAWDFGVPLLMIGCYSQLTPLTLITVAIILLVAHYMYLIPGLQAAA  
----->  
NS4B ----->  
2410 2420 2430 2440 2450 2460 2470 2480 2490 2500 2510 2520  
ARAAQKRTAAGIMKNPVVDGIVVDITDHTIDPQVEKMGQVLLIAVAVSAILSRITAWGGEAGALITAASTLWEGSPNKYWSSTAISL CNIFRGSYLAGASLIYTVTRNAGLVKRR  
----->  
NS4B ----->  
2530 2540 2550 2560 2570 2580 2590 2600 2610 2620 2630 2640  
GGGTGETLGEKWKARLNQMSALEFYSYKSGITEVCREEARRALKDGVAATGGHAVSRGSAKL RMLVERGYLQPYGKVIDLGCGRGGWYAAATIRKVKQEVKYGTKGPGHEEPVLVQSYG  
----->  
NS5 ----->  
2650 2660 2670 2680 2690 2700 2710 2720 2730 2740 2750 2760  
WNIVIRLKSQVDVFHMAEPCDITLLCDIGESSSPEVEEARTLRVL SNVGDWLEKRP GAFICIKVLCPYTTMMETLERLORRYGGGLVRVPLSRNSTHEMYWSGAKSNTIKSVSTTSQLL  
----->  
NS5 ----->  
2770 2780 2790 2800 2810 2820 2830 2840 2850 2860 2870 2880  
LGRMDGPRRPVYKEDVNLGSGTRAVVSCAEAFNMKIIIGNRIERIRSEHAETWFFDENHPYRTWAYHG SYEAPTQGSASLINGVWRLLSKFPWDVVTGVTGIAMTDTTPYGOQRVFKKVK  
----->  
NS5 ----->  
2890 2900 2910 2920 2930 2940 2950 2960 2970 2980 2990 3000  
DTRVPDPQEGTRQVMMSVSSWLWKLGHKRPVRC TKEEFINKVRSNAALGAI FEEEEKWKTAVEAVNDPRFWALVDKEREHHLRGECQSCVYNNMMGKREKQGEFGKAKGSRAIWYMWL  
----->  
NS5 ----->  
3010 3020 3030 3040 3050 3060 3070 3080 3090 3100 3110 3120  
GARFLFEALGFLNEDHMMGREN SGGGVEGLGLQRLGYVLEEMSRIPGGRMYADDTAGWDTIRSRFDLENEALITNQNEKHRLALALAIKYTYQNKVVKVLRFAEKGTVMDDIISRQDQ  
----->  
NS5 ----->  
3130 3140 3150 3160 3170 3180 3190 3200 3210 3220 3230 3240  
RGGQVVTYALNTFTNLVQLIRNMEAEVLEMQDLWLLRRSEKVTNWLQSNGWDRLEKRAVSGDGCVCVKPIDDRFAHALRFLNDHGKVRKDTQEWKPTSGWDNWEVFPFCSHHFNKHL  
----->  
NS5 ----->  
3250 3260 3270 3280 3290 3300 3310 3320 3330 3340 3350 3360  
KDGRSIVVPCRHODELIGRARVSPGAGWSIRETACLAKSYAQMWQLLYFHRRDLRLMANATCSSVPVDWVPTGRTTWSTHKGWEMTTEDMLVWNRVIEENDHMEKTPVTKWTDIPY  
----->  
NS5 ----->  
3370 3380 3390 3400 3410 3420  
LGKREDLWCGSLIGHRPRTWAENIKNTVMVRIIGDEEKYMDYLS TQVRYLGEESTPGVL  
----->  
NS5 ----->

**Supplementary Figure 1:** Complete ZIKV ICD Paraiba strain whole genome translated sequence used for construction of ZIKV GFPD library and depiction in Figures 1-3.

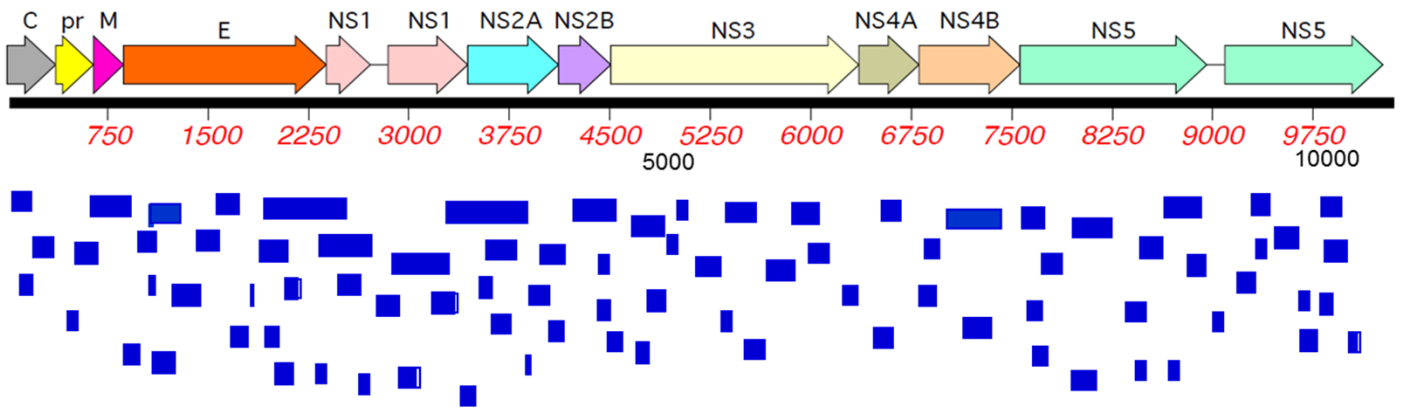

**Supplementary Figure 2: Random distribution of size and sequence of the ZIKV-GFPDL.** Sequencing of ZIKV whole genome fragments expressed by the phages of the ZIKV GFPDL libraries were aligned to the ZIKV\_ICD translated sequence (shown in Supplementary figure 1).

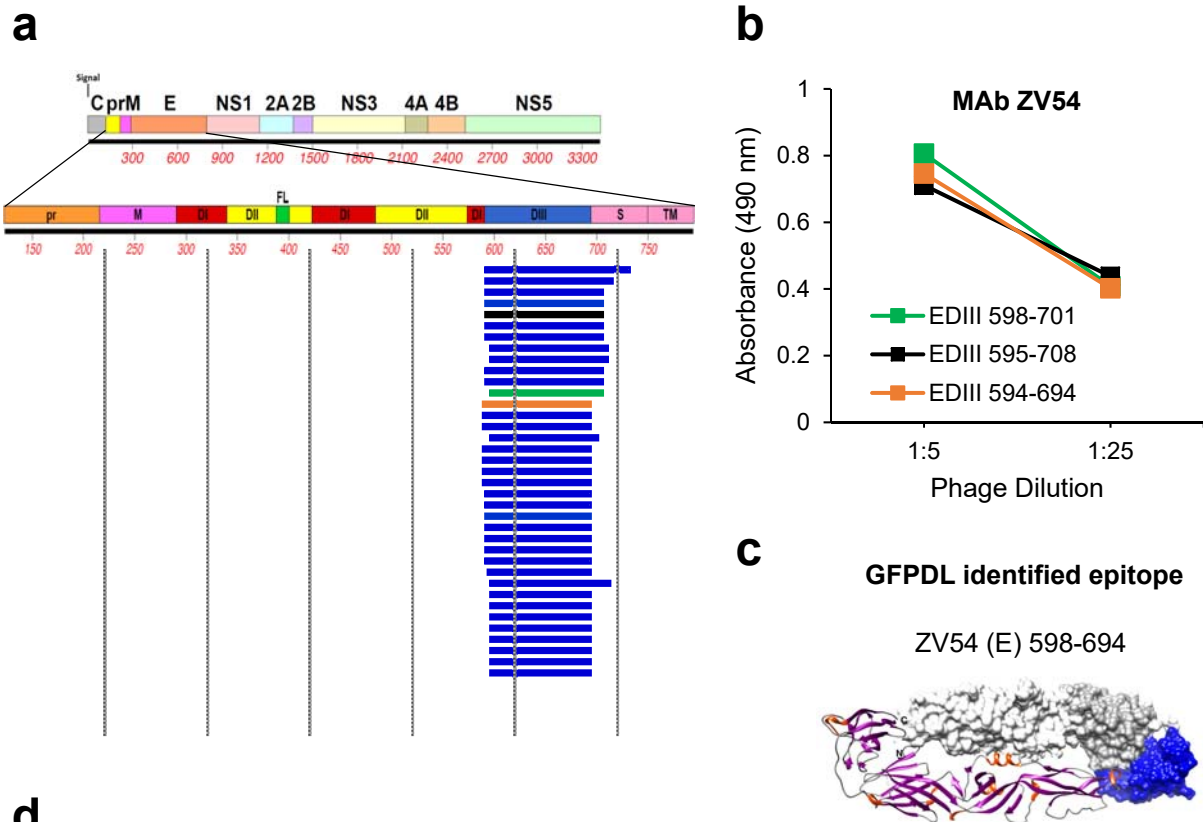

**d**

| ZIKV MAb | Neutralizing Strains                                                                                 | Epitope                                                                                  | AA Sequence                                                                                                                                         |
|----------|------------------------------------------------------------------------------------------------------|------------------------------------------------------------------------------------------|-----------------------------------------------------------------------------------------------------------------------------------------------------|
| ZV54     | ZIKV Asian, African, and American strains (Zika H/PF/2013, MR766, Uganda 1947, Paraiba, Brazil 2015) | Known Site using X-ray crystallography (conformational epitope- lateral ridge of EDIII ) | <b>589-</b><br>RLKGVSYSLCTAAFTFTKIPAETLHGTVTVE<br>VQYAGTDGPKVPAQMAVDMQTLTPVGRL<br>ITANPVITESTENSKMMLELDPPFGDSYIVIG<br>VGEKKITHHWHRSGSTI- <b>697</b> |
|          |                                                                                                      | GFPDL                                                                                    | <b>598-</b><br>CTAAFTFTKIPAETLHGTVTVEVQYAGTDG<br>PCKVPAQMAVDMQTLTPVGRLITANPVITE<br>STENSKMMLELDPPFGDSYIVIGVGEKKITH<br>HWHRSG- <b>694</b>            |

**Supplementary Figure 3: GFPDL based epitope mapping of neutralizing MAb ZV54.** a) GFPDL-based epitope mapping of neutralizing ZIKV mouse MAb ZV54 to prME. b) The ELISA reactivity of selected GFPDL identified phage clones to MAb ZV54 (highlighted in green, black and orange in a) was confirmed by phage ELISA. c) Structure of GFPDL-identified epitope on PDB#5JHM for mature E (595-694 residues of identified epitope 598-694 sequence are colored blue in the available structure). d) The minimal overlapping sequence for MAb ZV54 identified using GFPDL mapping (598-694) is shown in the table compared to the sequence previously identified ‘known site’ (Zhao et al., Cell, 2016).

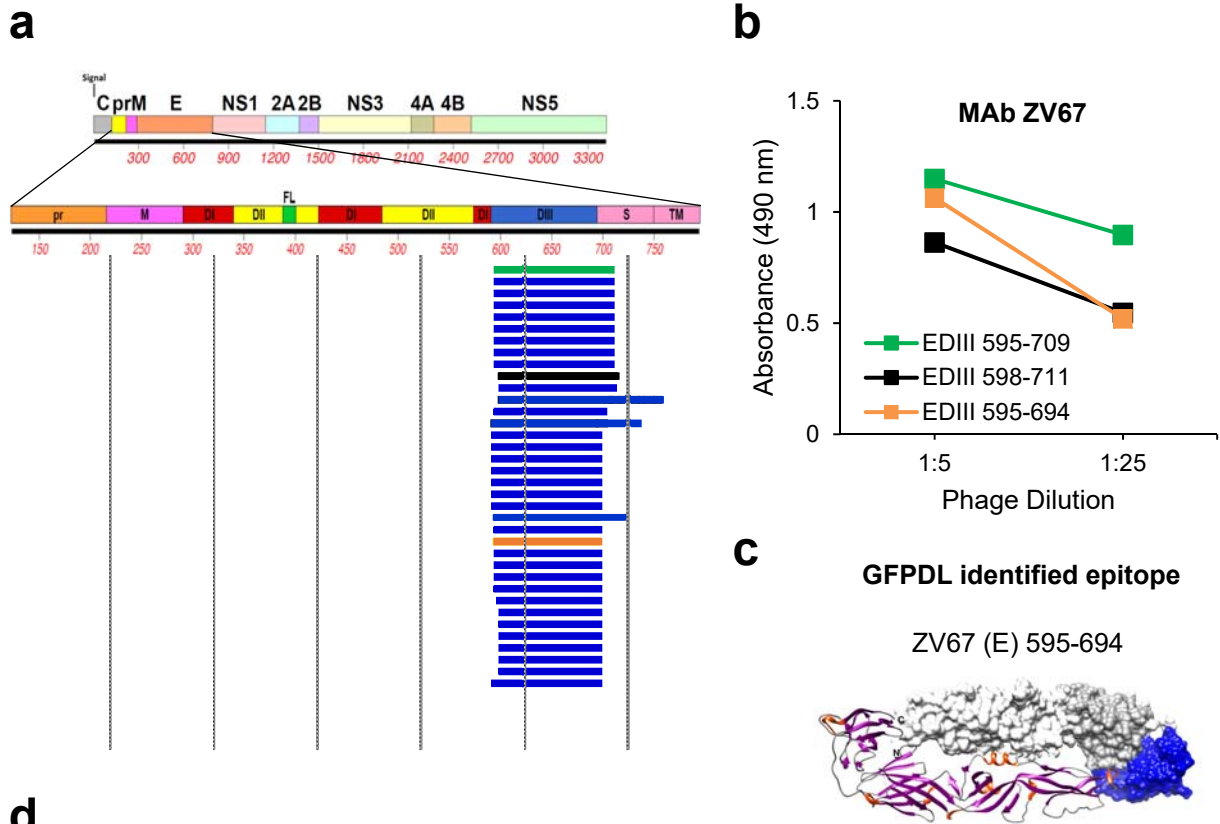

**d**

| ZIKV MAb | Neutralizing Strains                                                                                 | Epitope                                                                                  | AA Sequence                                                                                                                                          |
|----------|------------------------------------------------------------------------------------------------------|------------------------------------------------------------------------------------------|------------------------------------------------------------------------------------------------------------------------------------------------------|
| ZV67     | ZIKV Asian, African, and American strains (Zika H/PF/2013, MR766, Uganda 1947, Paraiba, Brazil 2015) | Known Site using X-ray crystallography (conformational epitope- lateral ridge of EDIII ) | <b>589-</b><br>RLKGVSYSLCTAAFTFTKIPAETLHGTVTVE<br>VQYAGTDGPCKVPAQMAVDMQTLTPVGR<br>LITANPVITESTENSKMMLELDPPFGDSYIVI<br>GVGEKKITHHWHRSGSTI- <b>697</b> |
|          |                                                                                                      | GFPDL                                                                                    | <b>595-</b><br>YSLCTAAFTFTKIPAETLHGTVTVEVQYAG<br>TDGPCKVPAQMAVDMQTLTPVGR<br>LITANPVITESTENSKMMLELDPPFGDSYIVIGVGE<br>KKITHHWHRSG- <b>694</b>          |

**Supplementary Figure 4: GFPDL based epitope mapping of neutralizing MAb ZV67.** a) GFPDL-based epitope mapping of neutralizing ZIKV mouse MAb ZV67 to prME. b) The ELISA reactivity of selected GFPDL identified phage clones to MAb ZV67 (highlighted in green, black and orange in a) was confirmed by phage ELISA. c) Structure of GFPDL-identified epitope on PDB#5JHM for mature E (595-694 residues of identified epitope 595-694 sequence are colored blue in the available structure). d) The overlapping sequence for MAb ZV67 identified using GFPDL mapping (595-694) is shown in the table compared to the sequence previously identified 'known site' (Zhao et al., Cell, 2016).

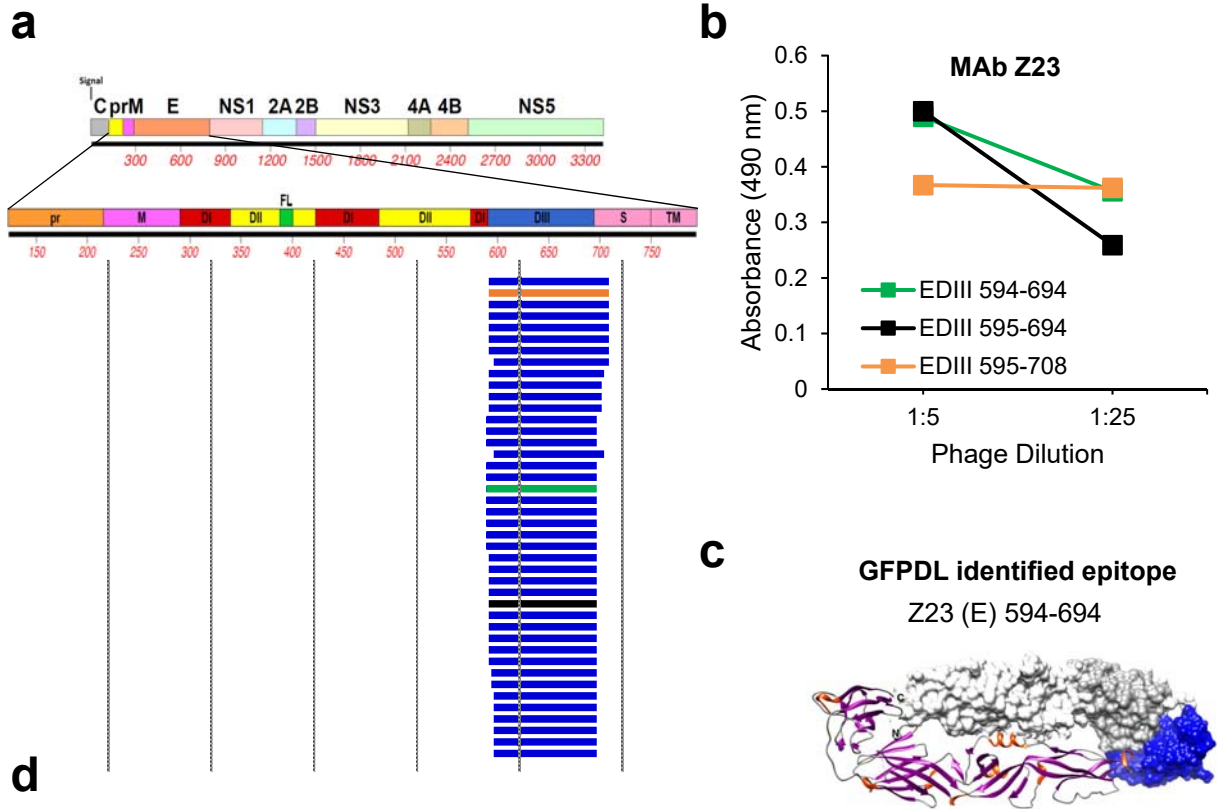

| ZIKV MAb | Neutralizing Strains     | Epitope                          | AA Sequence                                                                                                                                                        |
|----------|--------------------------|----------------------------------|--------------------------------------------------------------------------------------------------------------------------------------------------------------------|
| Z23      | ZIKV Asian strain SMGC-1 | Known Site using crystallography | ZIKV E DIII tertiary epitope (Z23 mainly binds to DIII of one envelope protein monomer and can cross-react with two envelope protein dimers on the virion surface) |
|          |                          | GFPDL                            | <b>594-</b><br>SYSLCTAAFTFTKIPAETLHGTVTVEVQYAGTDG<br>PCKVPAQMAVDMQTLTPVGRLLITANPVITESTEN<br>SKMMLELDPPFGDSYIVIGVGEKKITHHWHRSG-<br><b>694</b>                       |

**Supplementary Figure 5: GFPDL based epitope mapping of neutralizing human MAb Z23.** a) GFPDL-based epitope mapping of neutralizing ZIKV MAb Z23 to prME. b) The ELISA reactivity of selected GFPDL identified phage clones to MAb Z23 (highlighted in green, black and orange in a) was confirmed by phage ELISA and the ELISA positive clones are shown. c) Structure of GFPDL-identified epitope on PDB#5JHM for mature E colored blue on structure. d) The minimal sequence for MAb Z23 identified using GFPDL mapping (594-694, green in a) is shown in the table compared to the sequence previously identified 'known site' (Wang et. al., Sci. Trans. Med., 2016).

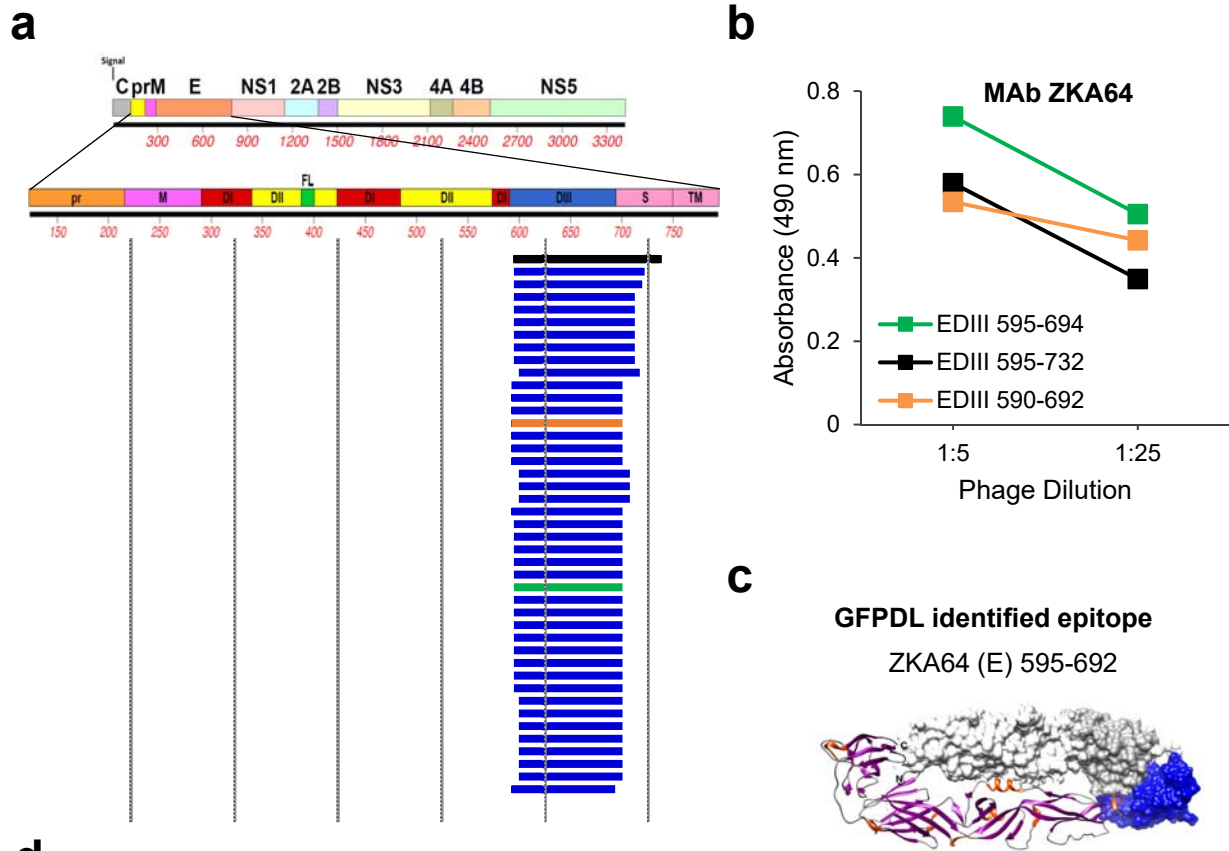

**d**

| ZIKV MAb | Neutralizing Strains  | Epitope    | AA Sequence                                                                                                                              |
|----------|-----------------------|------------|------------------------------------------------------------------------------------------------------------------------------------------|
| ZKA64    | Zika H/PF/2013, MR766 | Known Site | ZIKV E DIII                                                                                                                              |
|          |                       | GFPDL      | <b>595-</b><br>YSLCTAAFTFTKIPAETLHGTVTVEVQYAGTDG<br>PCKVPAQMAVDMQTLTPVGRLITANPVITESTE<br>NSKMMLELDPPFGDSYIVIGVGEKKITHHWHR-<br><b>692</b> |

**Supplementary Figure 6: GFPDL based epitope mapping of neutralizing human MAb ZKA64.** a) GFPDL-based epitope mapping of neutralizing ZIKV MAb ZKA64 to prME. b) The ELISA reactivity of selected GFPDL identified phage clones to MAb ZKA64 (highlighted in green, black and orange in a) was confirmed by phage ELISA and the ELISA positive clones are shown. c) Structure of GFPDL-identified epitope on PDB#5JHM for mature E colored blue on structure. d) The minimal overlapping sequence for MAb ZKA64 identified using GFPDL mapping (595-692, green in a) is shown in the table compared to the sequence previously identified 'known site' (Stettler et. al., Science, 2016).

### SPR binding following GFPDL adsorption

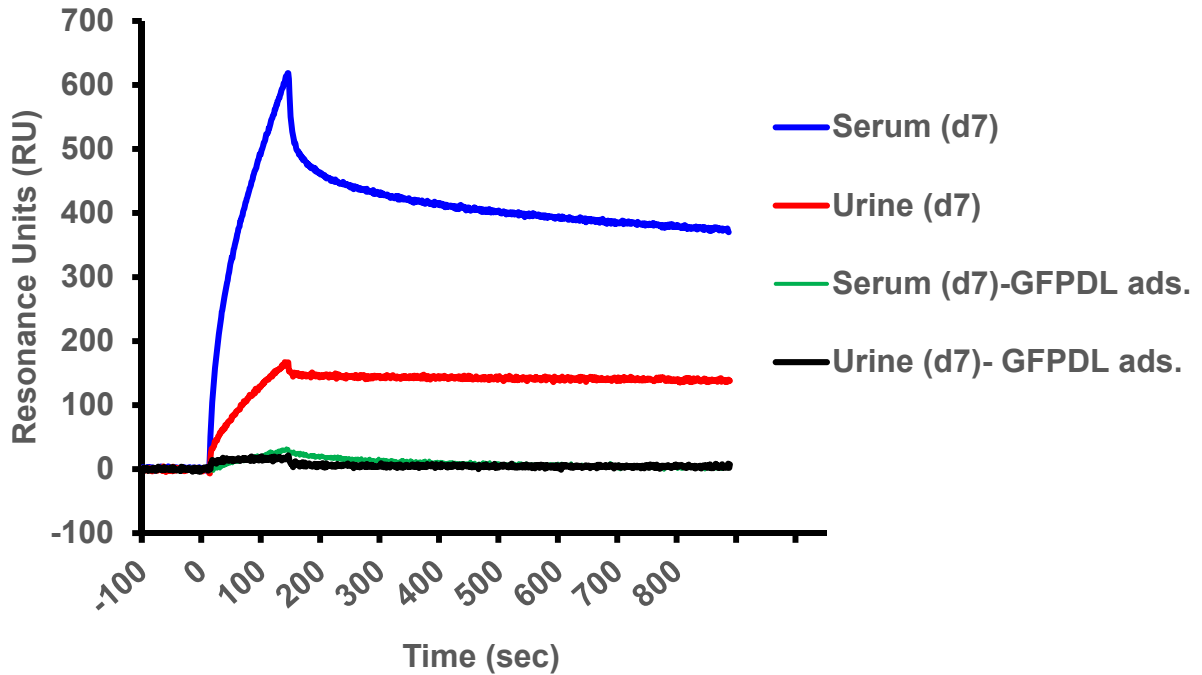

**Supplementary Figure 7: Anti-E reactivity of post-infection sera or urine in SPR before and after ZIKV-GFPDL adsorption.** Post infection sera or urine at day 7 from individuals was adsorbed on ZIKV-GFPDL coated petri dishes. Binding to recombinant ZIKV-E is shown before (Sera; blue and Urine; red lines) and after (Sera; green and Urine; black) GFPDL-adsorption in SPR.



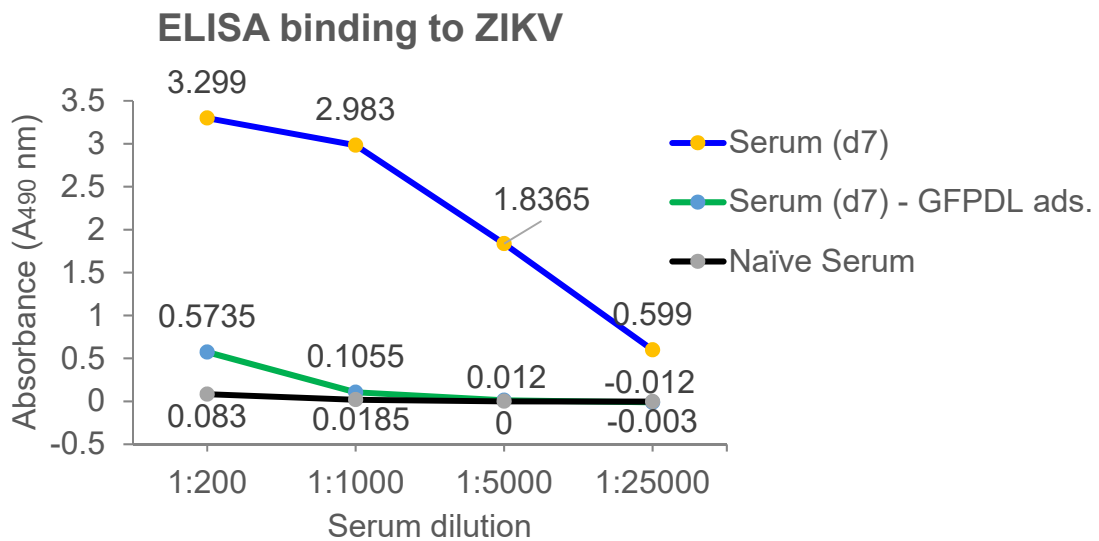

**Supplementary Figure 8: Adsorption of anti-ZIKV antibodies in post-infection sera using ZIKV-GFPDL.** Post ZIKV infection sera at day 7 (post-onset of symptoms) was adsorbed on ZIKV-GFPDL coated petri dishes. Antibody reactivity to Zika virus coated on polystyrene Immulon 2HB plates is shown before (blue line) and after (green line) GFPDL-adsorption in ELISA was revealed using HRP-conjugated goat anti-human IgA + IgG + IgM specific antibody. All data was normalized to 'virus only' background signal.

**A**

|             | IgM antibodies     | IgG antibodies    |
|-------------|--------------------|-------------------|
| Phage Titer | $3.29 \times 10^7$ | $3.7 \times 10^5$ |

**B**

**IgM antibodies**

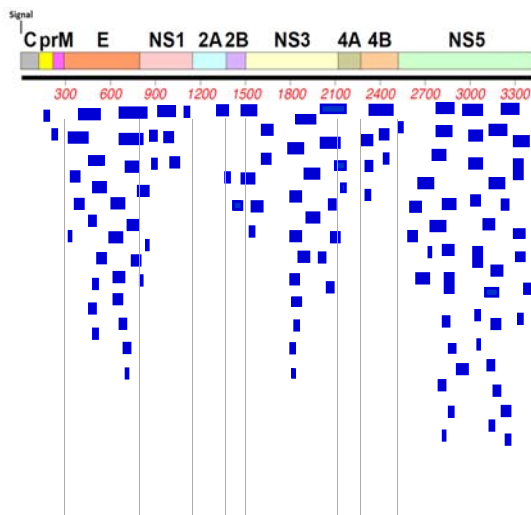

**C**

**IgG antibodies**

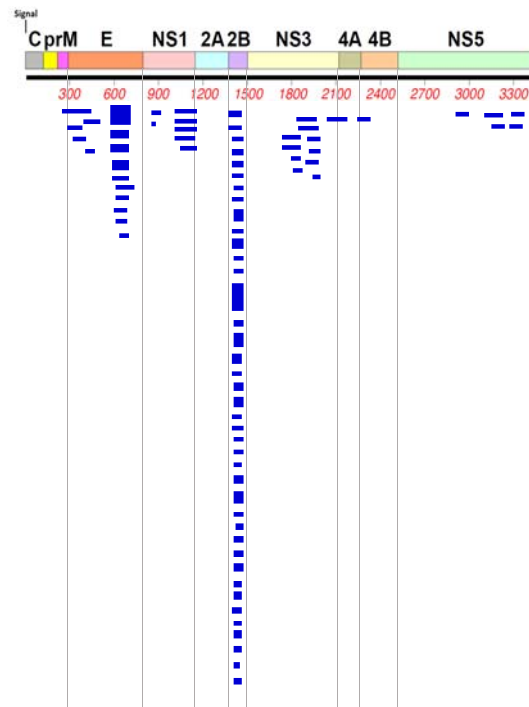

**Supplementary Figure 9: Individual antibody repertoires elicited following acute ZIKV infection using IgG and IgM specific capture beads by ZIKV GFPDL.** Alignment of bound phage clones to ZIKV genome. Schematic alignment of the peptide sequences recognized by IgM (A) and IgG (B) antibodies in ZIKV infected human sera (42-001-F at day 7 post-onset of illness), identified using ZIKV-GFPDL. The amino acid designation is based on the ZIKV polyprotein sequence encoded by the complete *ZIKV-ICD* genome (Supplementary Figure 1). Bars indicate identified peptides in the different structural (C, prM, E) and non-structural (NS) proteins on the ZIKV polyprotein sequence. Graphical distribution of representative clones with a frequency of  $\geq 2$ , obtained after affinity selection, are shown. The horizontal position and the length of the bars indicate the peptide sequence displayed on the selected phage clone to its homologous sequence in the ZIKV sequence on alignment. The thickness of each bar represents the frequency of repetitively isolated phages.

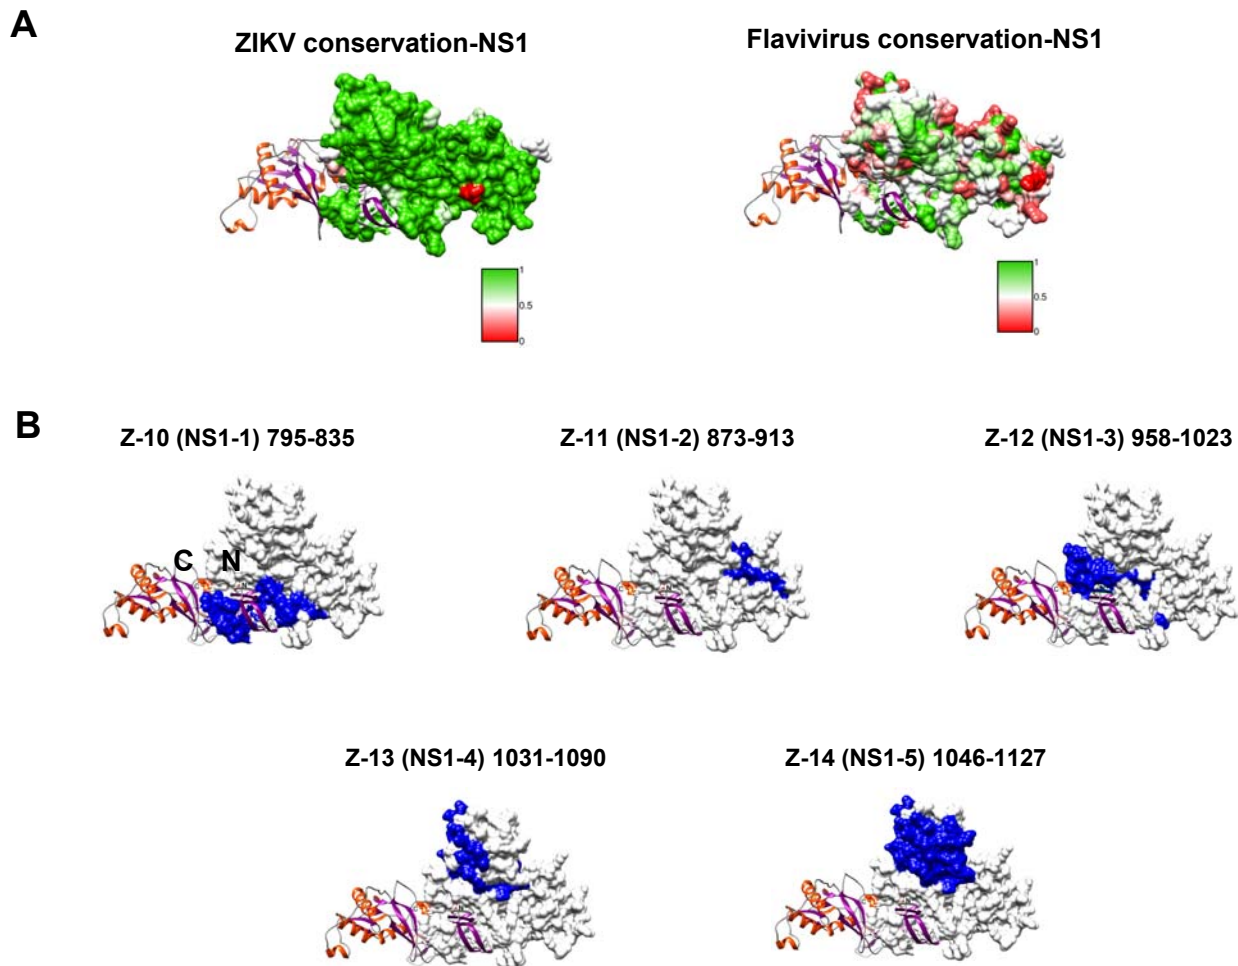

**Supplementary Figure 10: Structural representation of antigenic sites identified in ZIKV NS1 protein using GFDPL.** (A) Heat map on one monomer chain showing sequence conservation of various ZIKV (left panel; Paraiba, Uganda 1947, Nigeria 1968, Senegal 2001, Micronesia 2007 and Brazil 2016 strains) and flaviviruses (right panel; Dengue 1-4, West Nile, Yellow fever and ZIKV) conservation on ZIKV NS1 protein structure (PDB 5K6K). The heat map has been color coded from red (0) to green (1), where green denotes complete conservation. **b)** Antigenic sites have been depicted in blue on surface structures of ZIKV NS1 protein (PDB 5K6K). C- and N-terminals have been depicted on the first structure showing antigenic sites. Structure 5K6K encompasses residues 795-1146 on ZIKV\_ICD whole genome sequence.

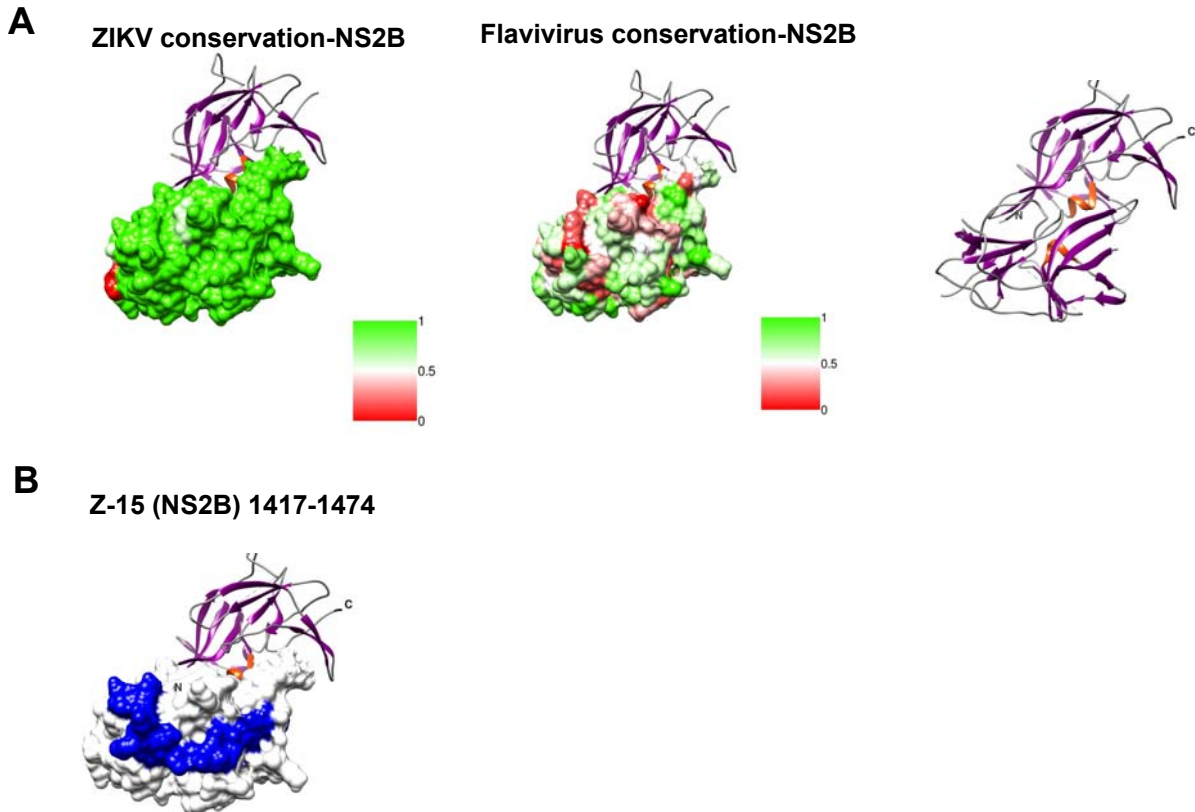

**Supplementary Figure 11: Structural representation of antigenic sites identified in ZIKV NS2B protein using GFDPL.** A) Heat map on one monomer chain showing various ZIKV (left panel; Paraiba/2015,MR766/Uganda/1947,Nigeria/IbH30656\_SM21V1-V3/1968, ArD157995/Senegal/2001, Micronesia/2007 and Brazil/2015 strains) and flaviviruses (center panel; Dengue\_1-4, West Nile, Yellow fever (and ZIKV) conservation on ZIKV NS2B-NS3 protein structure (PDB#5GXJ). The heat map has been color coded from red (0) to green (1), where green denotes complete conservation. C- and N-terminals have been depicted on the ribbon structure (right panel). B) Antigenic sites have been depicted in blue on surface structures of ZIKV NS2B protein (PDB#5GXJ). Structure PDB#5GXJ encompasses residues 1421-1673 on ZIKV ICD whole genome sequence.

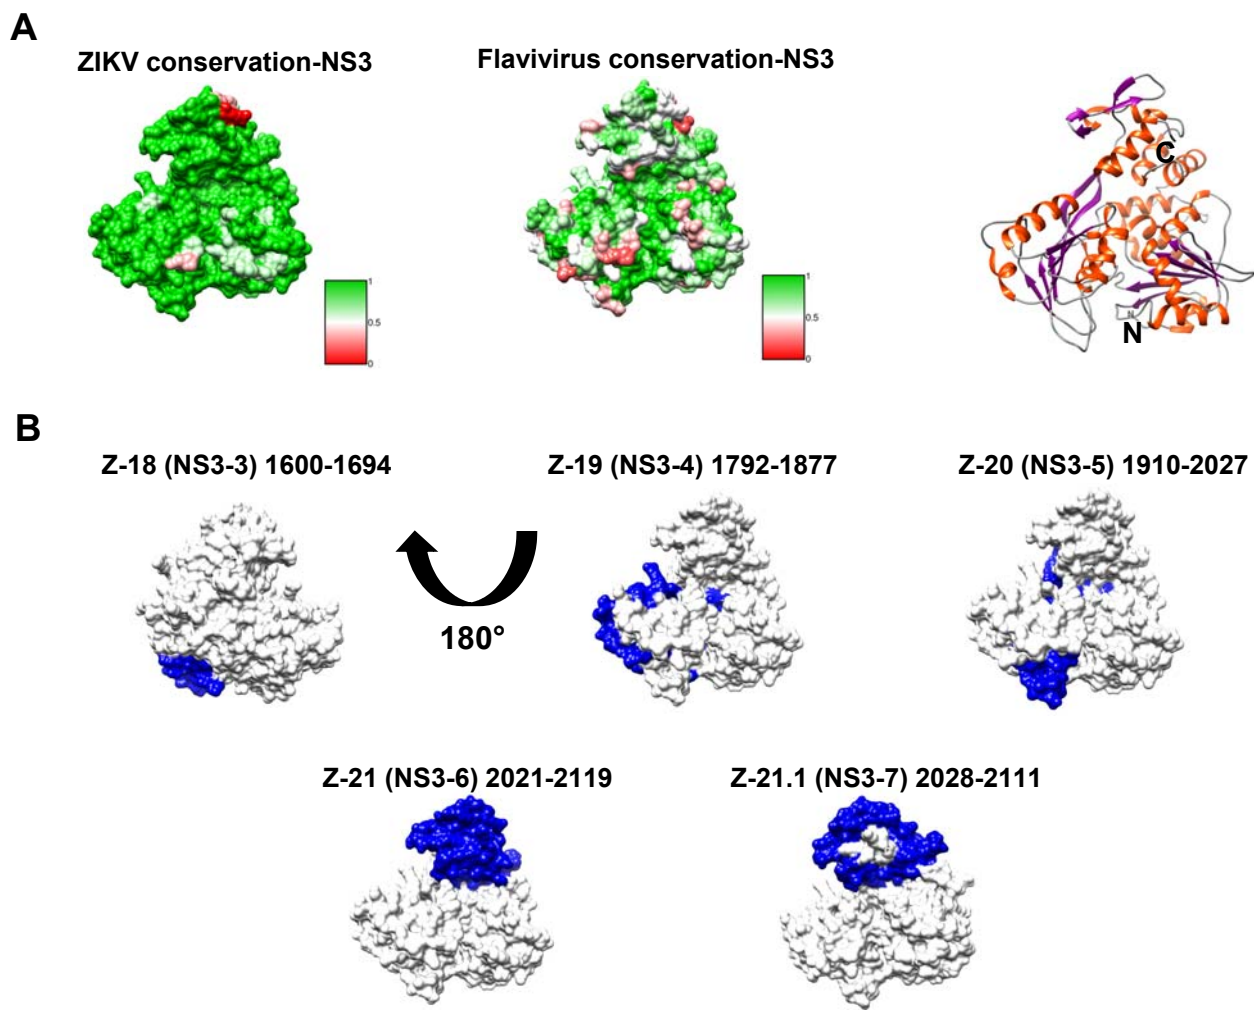

**Supplementary Figure 12: Structural representation of antigenic sites identified in ZIKV NS3 protein using GFDPL.** (A) Heat map showing various ZIKV (left panel; Paraiba, Uganda 1947, Nigeria 1968, Senegal 2001, Micronesia 2007 and Brazil 2016 strains) and flaviviruses (center panel; Dengue 1-4, West Nile virus, Yellow fever and ZIKV) conservation on ZIKV NS3 protein structure (PDB 5JRZ). The heat map has been color coded from red (0) to green (1), where green denotes complete conservation. C- and N- terminals have been depicted on the ribbon structure of 5JRZ (right panel). (B) Antigenic sites have been depicted in blue on surface structures of ZIKV NS3 protein (PDB 5JRZ). Structure 5JRZ encompasses residues 1677-2119 on ZIKV ICD whole genome sequence.

**Supplementary Figure 13: Structural representation of antigenic sites identified in ZIKV NS5 protein using GFDPL.** (A) Heat map showing various ZIKV (left panel; Paraiba, Uganda 1947, Nigeria 1968, Senegal 2001, Micronesia 2007 and Brazil 2016 strains) and flaviviruses (center panel; Dengue 1-4, West Nile virus, Yellow fever and ZIKV) conservation on ZIKV NS5 protein structure (PDB 5TFR). The heat map has been color coded from red (0) to green (1), where green denotes complete conservation. C- and N- terminals have been depicted on the ribbon structure of 5TFR (right panel). (B) Antigenic sites have been depicted in blue on surface structures of ZIKV NS5 protein (PDB 5TFR). Structure 5TFR encompasses residues 2525-3423 on ZIKV ICD whole genome sequence.



**A**

ZIKV conservation-NS5

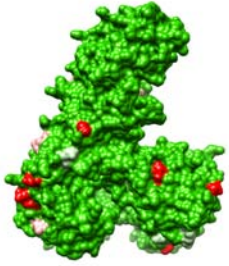

Flavivirus conservation-NS5

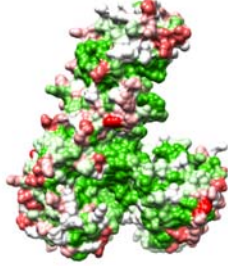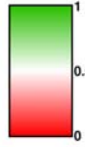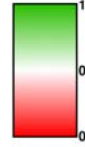

Z-25 (NS5-2) 2525-2608

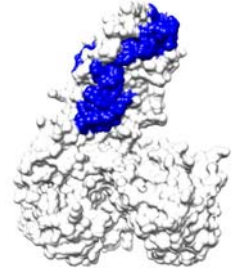**B**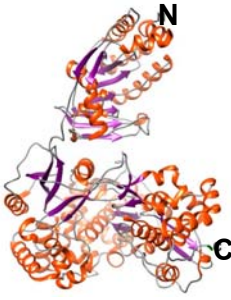

Z-26 (NS5-3) 2609-2665

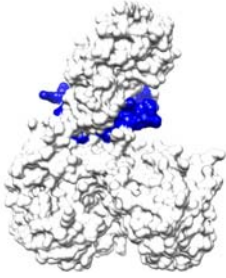

Z-27 (NS5-4) 2671-2753

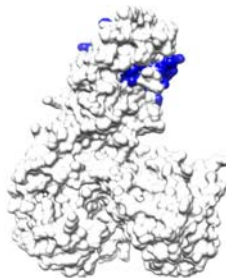

Z-28 (NS5-5) 2736-2829

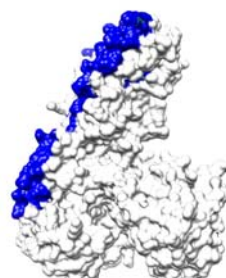

Z-28.1 (NS5-6) 2798-2831

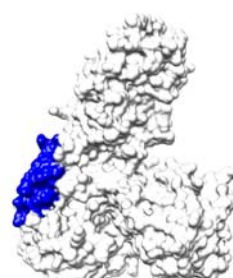

Z-29 (NS5-7) 2826-2898

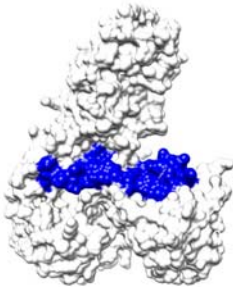

Z-30 (NS5-8) 2917-2979

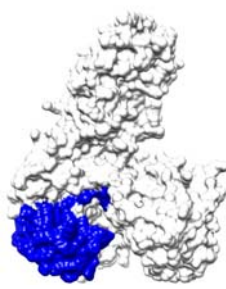

Z-31 (NS5-9) 2997-3050

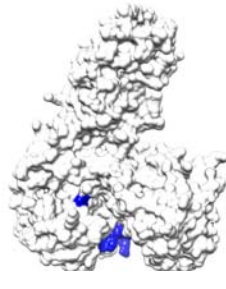

Z-32 (NS5-10) 3029-3174

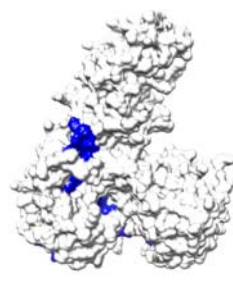
  
90°

Z-32.1 (NS5-11) 3039-3068

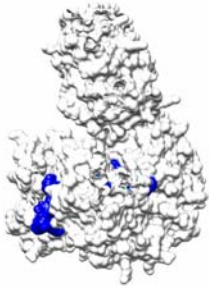

Z-32.1 (NS5-11) 3039-3068

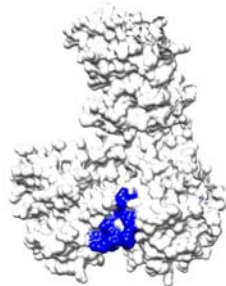
  
90°

Z-32.2 (NS5-12) 3104-3168

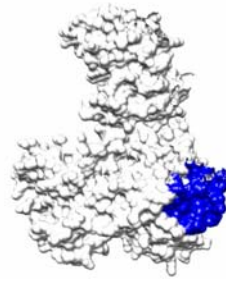

Z-33 (NS5-13) 3162-3241

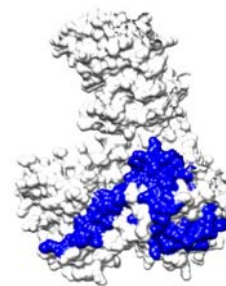

Z-33.1 (NS5-14) 3181-3239

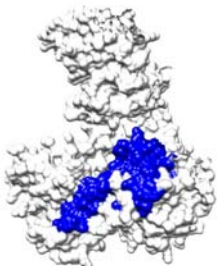

Z-34 (NS5-15) 3241-3275

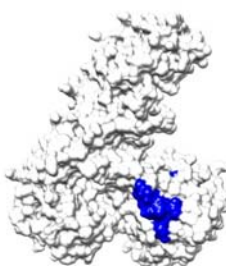

Z-35 (NS5-16) 3308-3368

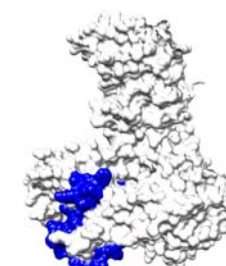

Z-36 (NS5-17) 3357-3417

  
180°
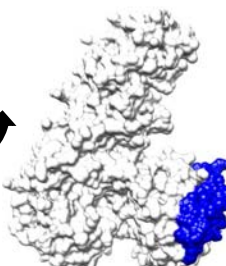

**Supplementary Figure 14: Percent similarity between different ZIKV strains and flaviviruses.** (A) Similarity between various ZIKV strains plotted as a percentage of ZIKV Paraiba strain (considered at 100%) whose genome structure with antigenic sites has been depicted. (B) Similarity between various flaviviruses plotted as a percentage of ZIKV Paraiba strain (considered at 100%) whose genome structure with antigenic sites have been depicted. In both cases, ZIKV Paraiba strain was used as a query sequence and was used to generate a plot that shows the percent similarity of the reference sequences (other flaviviruses (panel A), ZIKV strains (panel B) to the query sequence. A sliding window of size 200 bp or 20 bp was used, which passes through the alignment in steps of 1 bp to generate the plot showing different flaviviruses and all ZIKV strains respectively.



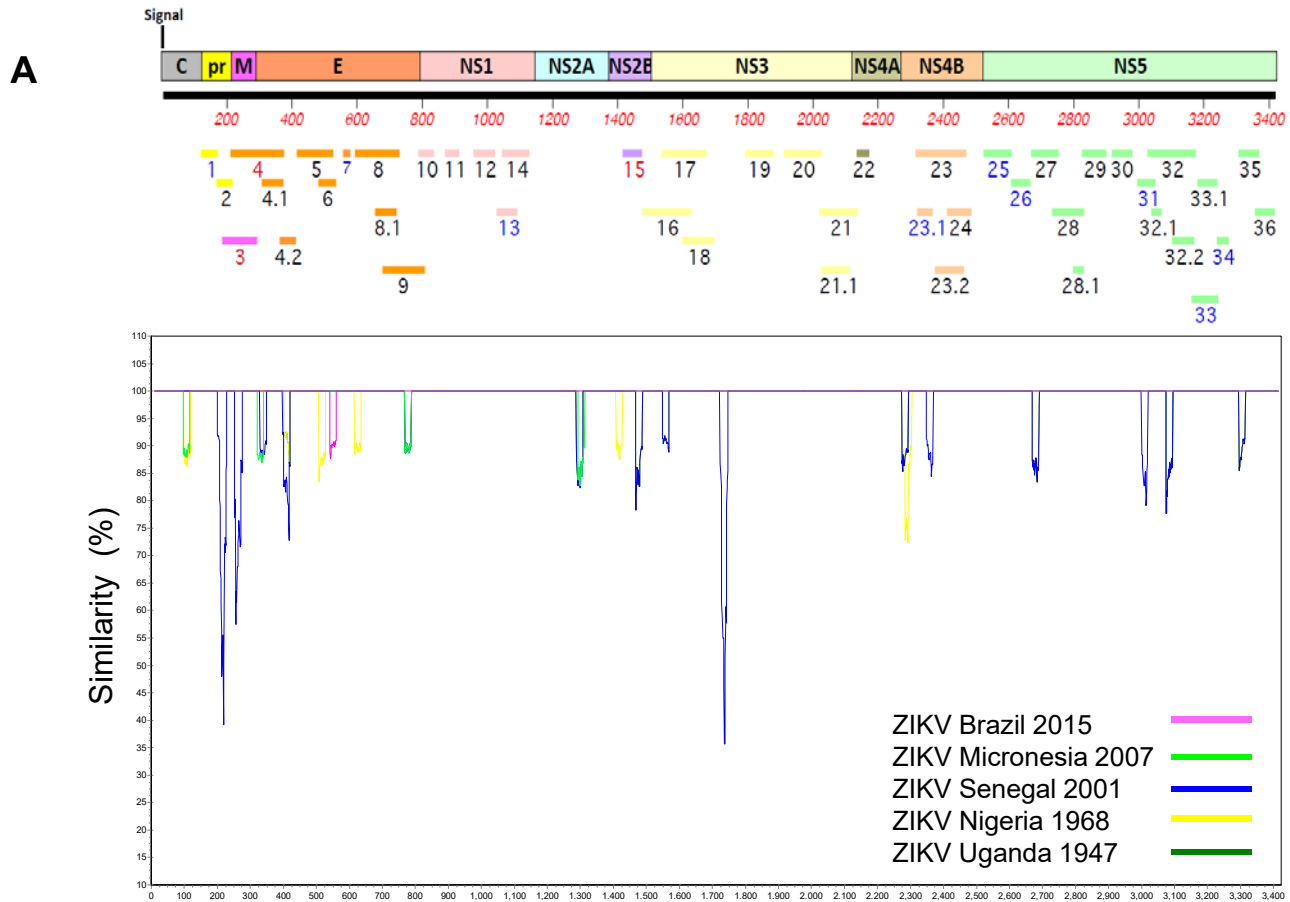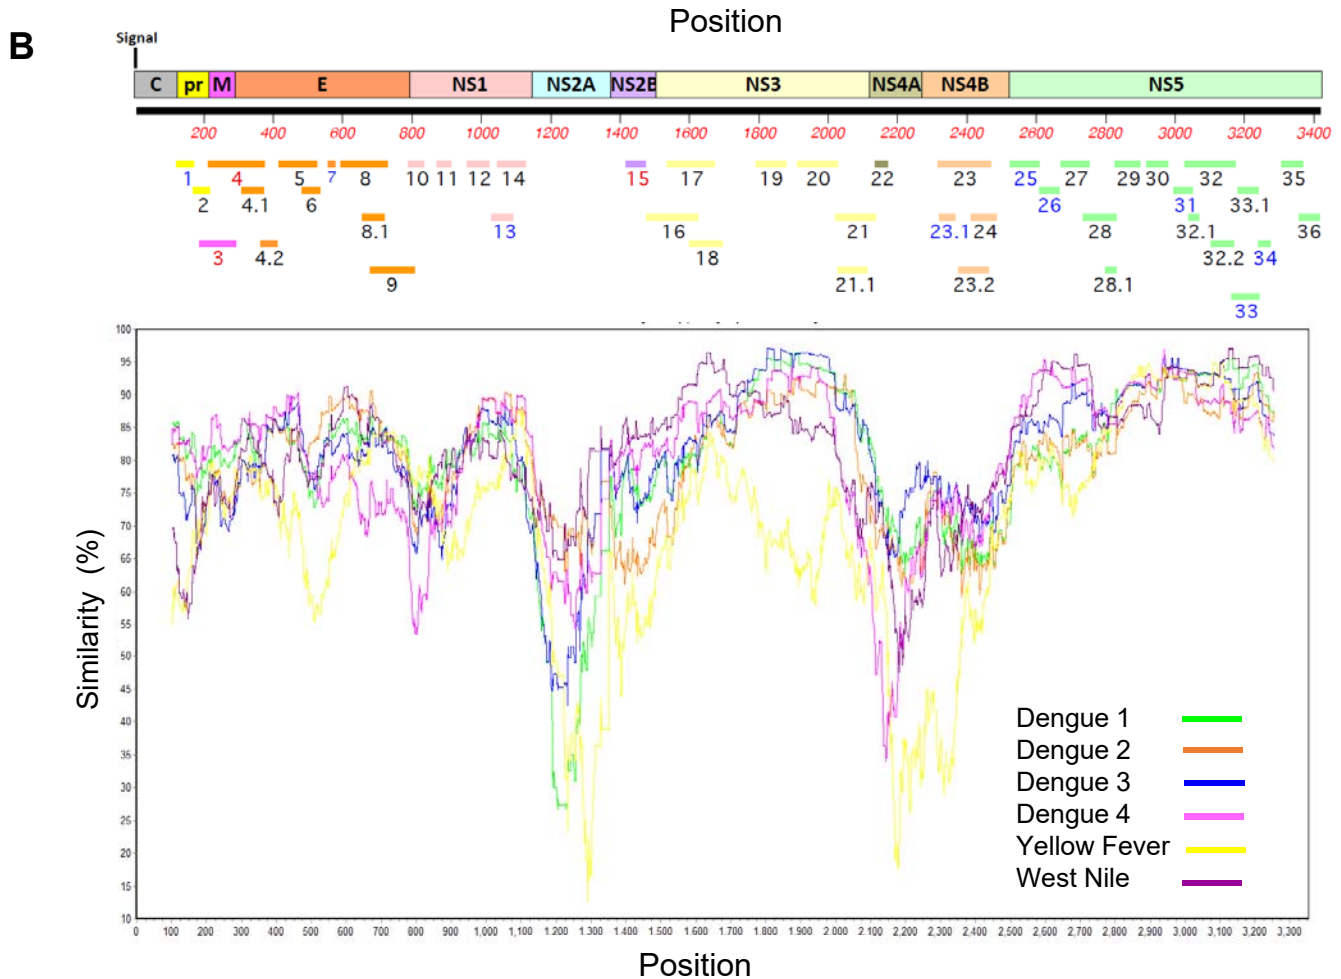

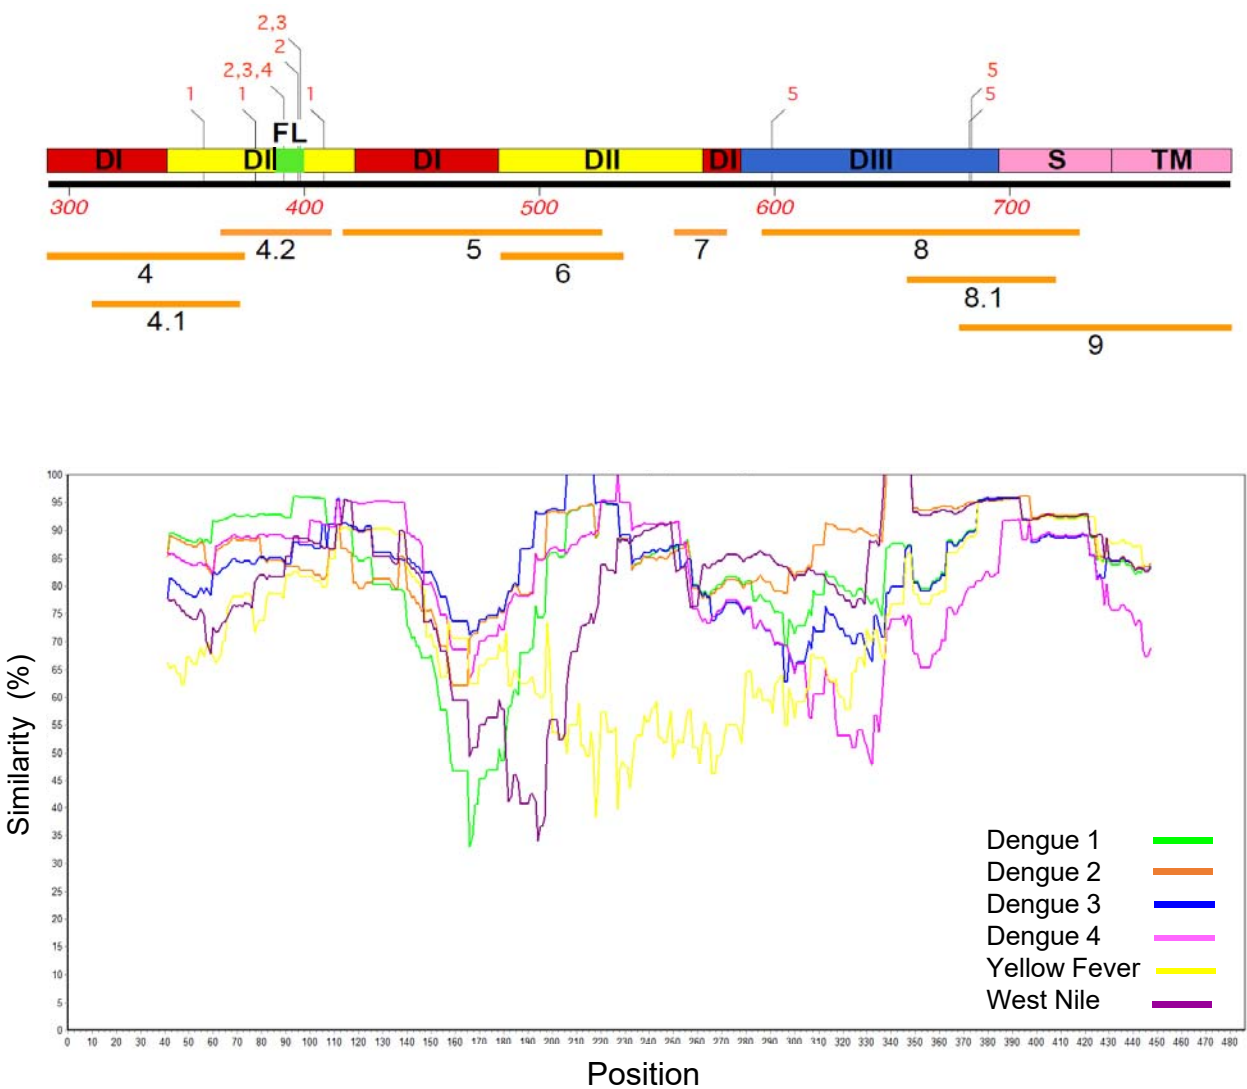

**Supplementary Figure 15: Similarity plot of Envelope (E) protein sequence of different flaviviruses.** For generating the plot, ZIKV\_Paraiba strain was used as the query sequence to obtain the percent similarity of various domains of E protein of different flaviviruses to the ZIKV E. Highest conservation was seen near the fusion loop region while the lowest was seen around domain I (Antigenic sites 5,6,7) showing potential specificity to ZIKV E protein. A sliding window size of 80 bp and a step size of 1 bp was used to generate the plot.

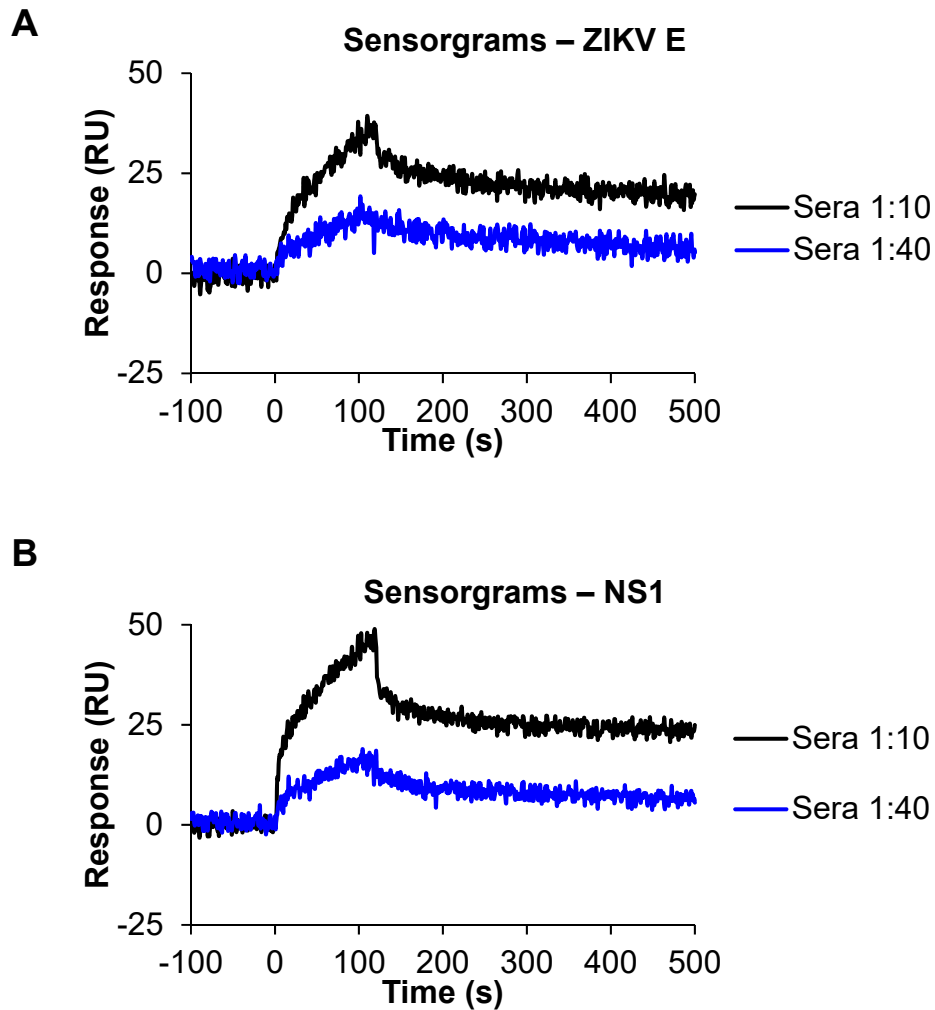

**Supplementary Figure 16**

**Steady-state equilibrium analysis of different dilutions of post-infection sera to ZIKV-E and NS1 protein by SPR.**

Serial dilutions of post-infection sera were injected simultaneously onto either ZIKV-E (A) or NS1 (B) protein immobilized on a GLC sensor chip and on a surface free of protein (used as a blank). Binding was recorded using BioRad Proteon surface plasmon resonance biosensor instrument. Responses from the protein surface were corrected for the response from the mock surface and for responses from a separate, buffer only injection. Antibody off-rate constants, which describe the fraction of antigen-antibody complexes that decay per second, were determined directly from the serum sample interaction with ZIKV-E using SPR in the dissociation phase only for the sensorgrams with Max RU in the range of 10-100 RU (shown here for 10x and 40x fold dilution of sera) and calculated using the BioRad ProteOn manager software for the heterogeneous sample model

**Supplementary Table 1: Demographic, epidemiological, serology and diagnostic information of samples used in the current study**

| Sample Characteristic |             |        |          |                     |                              | ELISA (Absorbance)^ |          |          |          | PCR*       |            |            |            |                 |                 |
|-----------------------|-------------|--------|----------|---------------------|------------------------------|---------------------|----------|----------|----------|------------|------------|------------|------------|-----------------|-----------------|
| ID                    | Visit (Day) | Gender | Age (Yr) | Prior DENV exposure | Days since Onset of Symptoms | ZIKV-IgG            | ZIKV-IgM | DENV-IgG | DENV-IgM | ZIKV-Serum | ZIKV-Urine | DENV-Serum | DENV-Urine | Pan-Flavi-Serum | Pan-Flavi-Urine |
| 41-001-F              | 0           | F      | 41       | NO                  | 2                            | 1.696               | 0.19     | 1.904    | 0.157    | 1          | 0          | 0          | 0          | 0               | 1               |
|                       | 3           |        |          |                     | 0.019                        | 0.536               | 0.019    | 0.127    | 0        | 1          | 0          | 0          | 0          | 1               |                 |
|                       | 7           |        |          |                     | 0.185                        | 1.572               | 0.014    | 0.127    | 0        | 1          | 0          | 0          | 0          | 1               |                 |
|                       | 28          |        |          |                     | 0.755                        | 0.995               | 0.044    | 0.139    |          |            |            |            |            |                 |                 |
| 41-002-F              | 0           | M      | 37       | NO                  | 2                            | 1.222               | 0.022    | 0.797    | 0.116    | 0          | 0          | 0          | 0          | 0               | 0               |
|                       | 3           |        |          |                     | 1.168                        | 0.024               | 0.832    | 0.12     | 0        | 0          | 0          | 0          | 0          | 0               |                 |
|                       | 7           |        |          |                     | 1.137                        | 0.029               | 0.774    | 0.117    | 1        | 0          | 0          | 0          | 1          | 0               |                 |
|                       | 28          |        |          |                     | 1.036                        | 0.03                | 0.681    | 0.112    |          |            |            |            |            |                 |                 |
| 41-003-F              | 0           | M      | 51       | NO                  | 3                            | 1.603               | 0.183    | 1.93     | 0.106    | 0          | 0          | 0          | 0          | 0               | 0               |
|                       | 3           |        |          |                     | 1.519                        | 0.14                | 1.788    | 0.09     | 1        | 0          | 0          | 0          | 1          | 0               |                 |
|                       | 28          |        |          |                     | 1.787                        | 0.18                | 1.321    | 0.082    |          |            |            |            |            |                 |                 |
| 41-006-F              | 0           | M      | 49       | NO                  | 3                            | 0.979               | 0.048    | 0.863    | 0.311    | 1          | 1          | 0          | 0          | 1               | 1               |
|                       | 3           |        |          |                     | 2.569                        | 0.292               | 2.185    | 0.373    | 1        | 1          | 0          | 0          | 1          | 1               |                 |
|                       | 7           |        |          |                     | 2.544                        | 0.332               | 9.999    | 0.531    | 0        | 1          | 0          | 0          | 0          | 1               |                 |
|                       | 28          |        |          |                     | 2.494                        | 0.245               | 9.999    | 0.457    |          |            |            |            |            |                 |                 |
| 41-010-F              | 0           | F      | 32       | NO                  | 3                            | 0.171               | 0.079    | 0.602    | 0.082    | 0          | 1          | 0          | 0          | 0               | 1               |
|                       | 3           |        |          |                     | 1.032                        | 0.176               | 1.38     | 0.101    | 0        | 0          | 0          | 0          | 0          | 0               |                 |
|                       | 7           |        |          |                     | 1.943                        | 0.635               | 9.999    | 0.246    | 0        | 0          | 0          | 0          | 0          | 0               |                 |
|                       | 28          |        |          |                     | 1.692                        | 0.972               | 2.935    | 0.24     |          |            |            |            |            |                 |                 |
| 41-017-F              | 0           | F      | 34       | NO                  | 3                            | 0.229               | 0.085    | 0.815    | 0.317    | 1          | 1          | 0          | 0          | 1               | 1               |
|                       | 3           |        |          |                     | 1.162                        | 0.271               | 1.861    | 0.363    | 0        | 1          | 0          | 0          | 0          | 1               |                 |
|                       | 7           |        |          |                     | 1.591                        | 0.626               | 9.999    | 0.806    | 0        | 1          | 0          | 0          | 0          | 1               |                 |
|                       | 28          |        |          |                     | 2.282                        | 0.231               | 9.999    | 0.635    |          |            |            |            |            |                 |                 |
| 41-023-F              | 0           | F      | 33       | NO                  | 0                            | 0.83                | 0.152    | 1.358    | 0.211    | 1          | 1          | 0          | 0          | 0               | 0               |
|                       | 3           |        |          |                     | 2.629                        | 0.251               | 9.999    | 0.478    | 0        | 1          | 0          | 0          | 0          | 1               |                 |
|                       | 7           |        |          |                     | 2.684                        | 0.348               | 9.999    | 0.685    | 0        | 1          | 0          | 0          | 0          | 0               |                 |
|                       | 28          |        |          |                     | 2.613                        | 0.266               | 9.999    | 0.524    |          |            |            |            |            |                 |                 |
| 41-028-F              | 0           | M      | 38       | NO                  | 5                            | 1.257               | 0.04     | 0.484    | 9.999    | 1          | 0          | 0          | 0          | 0               | 0               |
|                       | 3           |        |          |                     | 2.445                        | 0.168               | 9.999    | 9.999    | 0        | 1          | 0          | 0          | 0          | 0               |                 |
|                       | 7           |        |          |                     | 2.445                        | 0.382               | 9.999    | 9.999    | 0        | 0          | 0          | 0          | 0          | 0               |                 |
|                       | 28          |        |          |                     | 2.024                        | 0.122               | 2.851    | 9.999    |          |            |            |            |            |                 |                 |
| 41-031-F              | 0           | M      | 19       | NO                  | 2                            | 1.858               | 0.037    | 0.374    | 0.04     | 0          | 1          |            |            |                 |                 |
|                       | 3           |        |          |                     | 2.576                        | 0.062               | 0.593    | 0.059    | 0        | 1          | 0          | 0          | 0          | 0               |                 |
|                       | 7           |        |          |                     | 2.867                        | 0.217               | 1.159    | 0.085    | 0        | 1          | 0          | 0          | 0          | 0               |                 |
|                       | 28          |        |          |                     | 2.678                        | 0.045               | 1.022    | 0.075    |          |            |            |            |            |                 |                 |

|          |                   |   |    |     |                    |                                  |                                  |                                  |                                  |                  |                  |                  |                  |                  |                  |
|----------|-------------------|---|----|-----|--------------------|----------------------------------|----------------------------------|----------------------------------|----------------------------------|------------------|------------------|------------------|------------------|------------------|------------------|
| 41-036-F | 0<br>3<br>7<br>28 | M | 50 | NO  | 3<br>6<br>10<br>31 | 1.32<br>2.599<br>2.486<br>2.455  | 0.566<br>1.146<br>0.734<br>0.163 | 1.583<br>9.999<br>9.999<br>9.999 | 0.135<br>0.307<br>0.295<br>0.276 | 0<br>0<br>0<br>0 | 1<br>1<br>1<br>0 | 0<br>0<br>0<br>0 | 0<br>0<br>0<br>0 | 0<br>0<br>0<br>0 | 1<br>0<br>0<br>0 |
| 42-001-F | 0<br>3<br>7<br>28 | F | 35 | NO  | 0<br>3<br>7<br>28  | 0.063<br>1.417<br>2.233<br>1.218 | 0.023<br>0.142<br>0.218<br>0.137 | 0.075<br>1.396<br>9.999<br>2.187 | 0.185<br>0.578<br>0.99<br>0.401  | 1<br>0<br>0<br>0 | 1<br>1<br>1<br>0 | 0<br>0<br>0<br>0 | 0<br>0<br>0<br>0 | 1<br>0<br>0<br>0 | 1<br>1<br>1<br>0 |
| 42-002-F | 0<br>3<br>7<br>28 | M | 18 | YES | 0<br>3<br>7<br>28  | 0.893<br>0.938<br>0.915<br>0.968 | 0.028<br>0.031<br>0.025<br>0.038 | 1.591<br>1.502<br>1.437<br>1.344 | 0.178<br>0.171<br>0.179<br>0.238 | 0<br>0<br>0<br>0 | 0<br>1<br>0<br>0 | 0<br>0<br>0<br>0 | 0<br>0<br>0<br>0 | 0<br>0<br>0<br>0 | 0<br>1<br>0<br>0 |
| 42-003-F | 0<br>3<br>7<br>28 | M | 37 | NO  | 1<br>4<br>8<br>29  | 0.397<br>1.8<br>2.386<br>2.172   | 0.017<br>0.025<br>0.2<br>0.135   | 0.205<br>0.45<br>9.999<br>9.999  | 0.114<br>0.194<br>0.802<br>1.049 | 1<br>0<br>0<br>0 | 1<br>1<br>1<br>0 | 0<br>0<br>0<br>0 | 0<br>0<br>0<br>0 | 1<br>0<br>0<br>0 | 1<br>1<br>1<br>0 |
| 42-004-F | 0<br>3<br>7<br>28 | F | 27 | NO  | 5<br>8<br>12<br>33 | 1.663<br>1.516<br>1.452<br>1.414 | 0.057<br>0.065<br>0.039<br>0.089 | 1.556<br>1.673<br>1.486<br>1.504 | 0.079<br>0.083<br>0.072<br>0.075 | 0<br>0<br>0<br>0 | 1<br>0<br>0<br>0 | 0<br>0<br>0<br>0 | 0<br>0<br>0<br>0 | 0<br>0<br>0<br>0 | 0<br>0<br>0<br>0 |
| 42-007-F | 0<br>3<br>7<br>28 | F | 24 | NO  | 5<br>8<br>12<br>33 | 0.291<br>0.956<br>2.426<br>2.908 | 0.088<br>0.111<br>0.235<br>0.151 | 1.112<br>1.505<br>9.999<br>9.999 | 0.18<br>0.222<br>0.61<br>0.46    | 1<br>0<br>0<br>0 | 1<br>1<br>0<br>0 | 0<br>0<br>0<br>0 | 0<br>0<br>0<br>0 | 1<br>0<br>0<br>0 | 1<br>1<br>0<br>0 |
| 42-008-F | 0<br>3<br>7<br>28 | M | 35 | NO  | 4<br>7<br>11<br>32 | 0.837<br>2.32<br>2.516<br>9.999  | 0.025<br>0.041<br>0.314<br>0.154 | 1.464<br>9.999<br>9.999<br>9.999 | 0.134<br>0.395<br>0.511<br>0.39  | 0<br>0<br>0<br>0 | 1<br>1<br>0<br>0 | 0<br>0<br>0<br>0 | 0<br>0<br>0<br>0 | 0<br>0<br>0<br>0 | 1<br>0<br>0<br>0 |
| 42-014-F | 0<br>3<br>7<br>28 | F | 32 | NO  | 5<br>8<br>12<br>33 | 0.091<br>0.397<br>0.954<br>0.938 | 0.337<br>0.88<br>0.553<br>0.372  | 1.762<br>9.999<br>9.999<br>9.999 | 0.661<br>0.787<br>0.795<br>0.742 | 1<br>0<br>0<br>0 | 1<br>1<br>1<br>0 | 0<br>0<br>0<br>0 | 0<br>0<br>0<br>0 | 0<br>0<br>0<br>0 | 0<br>1<br>0<br>0 |
| 42-018-F | 0<br>3<br>7<br>28 | F | 33 | NO  | 0<br>3<br>7<br>28  | 0.269<br>1.425<br>2.711<br>2.289 | 0.043<br>0.086<br>0.405<br>0.125 | 0.496<br>0.812<br>9.999<br>9.999 | 0.111<br>0.128<br>0.577<br>0.346 | 1<br>1<br>0<br>0 | 1<br>1<br>1<br>0 | 0<br>0<br>0<br>0 | 0<br>0<br>0<br>0 | 1<br>0<br>1<br>0 | 0<br>1<br>0<br>0 |
| 43-026-F | 0<br>3<br>7<br>28 | F | 46 | NO  | 3<br>6<br>10<br>31 | 1.768<br>2.716<br>2.79<br>2.682  | 0.109<br>0.169<br>0.156<br>0.182 | 0.669<br>9.999<br>9.999<br>9.999 | 0.235<br>0.517<br>0.696<br>0.365 | 1<br>0<br>0<br>0 | 1<br>1<br>1<br>0 | 0<br>0<br>0<br>0 | 0<br>0<br>0<br>0 | 0<br>0<br>0<br>0 | 1<br>1<br>1<br>0 |

^ Serologic assays were performed for ZIKA IgG and IgM antibodies by ELISA (Euroimmun), DENV IgG and IgM antibodies by ELISA (Panbio) using commercial diagnostic kits.

\* PCR assays for Zika (recommended by WHO), Dengue and Pan-flavivirus were performed as described in Methods. PCR results are shown as: 1; positive, and 0 ; negative.

**Supplementary Table 2: Clinical Symptoms, collection dates and days since onset of symptoms for the acutely ZIKV infected patients**

| Sample Characteristic |             |        |          |                |                              | Symptoms                        |
|-----------------------|-------------|--------|----------|----------------|------------------------------|---------------------------------|
| ID                    | Visit (Day) | Gender | Age (Yr) | Date of Sample | Days since Onset of Symptoms | Number of symptoms <sup>a</sup> |
| 41-001-F              | 0           | F      | 41       | 6/21/2016      | 2                            | 13                              |
|                       | 3           |        |          | 6/23/2016      | 5                            | 10                              |
|                       | 7           |        |          | 6/28/2016      | 9                            | 6                               |
|                       | 28          |        |          | 7/22/2016      | 30                           |                                 |
| 41-002-F              | 0           | M      | 37       | 6/22/2016      | 2                            | 8                               |
|                       | 3           |        |          | 6/24/2016      | 5                            | 8                               |
|                       | 7           |        |          | 6/29/2016      | 9                            | 4                               |
|                       | 28          |        |          | 7/20/2016      | 30                           | 7                               |
| 41-003-F              | 0           | M      | 51       | 6/27/2016      | 3                            | 11                              |
|                       | 3           |        |          | 6/29/2016      | 6                            | 14                              |
|                       | 28          |        |          | 7/25/2016      | 31                           | 8                               |
| 41-006-F              | 0           | M      | 49       | 7/5/2016       | 3                            | 5                               |
|                       | 3           |        |          | 7/8/2016       | 6                            | 9                               |
|                       | 7           |        |          | 7/13/2016      | 10                           | 2                               |
|                       | 28          |        |          | 8/1/2016       | 31                           | 2                               |
| 41-010-F              | 0           | F      | 32       | 7/13/2016      | 3                            | 13                              |
|                       | 3           |        |          | 7/15/2016      | 6                            | 5                               |
|                       | 7           |        |          | 7/20/2016      | 10                           | 4                               |
|                       | 28          |        |          | 8/12/2016      | 31                           | 2                               |
| 41-017-F              | 0           | F      | 34       | 8/8/2016       | 3                            | 13                              |
|                       | 3           |        |          | 8/10/2016      | 6                            | 6                               |
|                       | 7           |        |          | 8/15/2016      | 10                           | 6                               |
|                       | 28          |        |          | 9/5/2016       | 31                           | 3                               |
| 41-023-F              | 0           | F      | 33       | 8/22/2016      | 0                            | 16                              |
|                       | 3           |        |          | 8/25/2016      | 3                            | 10                              |
|                       | 7           |        |          | 8/29/2016      | 7                            | 2                               |
|                       | 28          |        |          | 9/20/2016      | 28                           | 6                               |
| 41-028-F              | 0           | M      | 38       | 9/6/2016       | 5                            | 11                              |
|                       | 3           |        |          | 9/9/2016       | 8                            | 3                               |
|                       | 7           |        |          | 9/14/2016      | 12                           | 1                               |
|                       | 28          |        |          | 10/5/2016      | 33                           | 1                               |
| 41-031-F              | 0           | M      | 19       | 9/12/2016      | 2                            | 12                              |
|                       | 3           |        |          | 9/14/2016      | 5                            | 13                              |
|                       | 7           |        |          | 9/19/2016      | 9                            | 5                               |
|                       | 28          |        |          | 10/10/2016     | 30                           | 11                              |
| 41-036-F              | 0           | M      | 50       | 10/10/2016     | 3                            | 19                              |
|                       | 3           |        |          | 10/13/2016     | 6                            | 7                               |
|                       | 7           |        |          | 10/17/2016     | 10                           | 11                              |
|                       | 28          |        |          | 11/9/2016      | 31                           | 14                              |
| 42-001-F              | 0           | F      | 35       | 6/24/2016      | 0                            | 17                              |
|                       | 3           |        |          | 6/27/2016      | 3                            | 15                              |
|                       | 7           |        |          | 7/1/2016       | 7                            | 12                              |
|                       | 28          |        |          | 7/22/2016      | 28                           | 7                               |
| 42-002-F              | 0           | M      | 18       | 6/29/2016      | 0                            | 7                               |
|                       | 3           |        |          | 7/1/2016       | 3                            | 9                               |
|                       | 7           |        |          | 7/6/2016       | 7                            | 4                               |
|                       | 28          |        |          | 7/29/2016      | 28                           | 3                               |

|          |                   |   |    |                                                     |                    |                     |
|----------|-------------------|---|----|-----------------------------------------------------|--------------------|---------------------|
| 42-003-F | 0<br>3<br>7<br>28 | M | 37 | 7/8/2016<br>7/11/2016<br>7/15/2016<br>8/5/2016      | 1<br>4<br>8<br>29  | 5<br>8<br>8<br>1    |
| 42-004-F | 0<br>3<br>7<br>28 | F | 27 | 7/11/2016<br>7/15/2016<br>7/18/2016<br>8/8/2016     | 5<br>8<br>12<br>33 | 6<br>9<br>5<br>7    |
| 42-007-F | 0<br>3<br>7<br>28 | F | 24 | 7/26/2016<br>7/29/2016<br>8/2/2016<br>8/23/2016     | 5<br>8<br>12<br>33 | 11<br>12<br>11<br>5 |
| 42-008-F | 0<br>3<br>7<br>28 | M | 35 | 7/26/2016<br>7/29/2016<br>8/2/2016<br>8/23/2016     | 4<br>7<br>11<br>32 | 6<br>6<br>6<br>6    |
| 42-014-F | 0<br>3<br>7<br>28 | F | 32 | 8/17/2016<br>8/19/2016<br>8/24/2016<br>9/14/2016    | 5<br>8<br>12<br>33 | 13<br>10<br>10<br>7 |
| 42-018-F | 0<br>3<br>7<br>28 | F | 33 | 9/21/2016<br>9/23/2016<br>9/28/2016<br>10/20/2016   | 0<br>3<br>7<br>28  | 11<br>10<br>10<br>9 |
| 43-026-F | 0<br>3<br>7<br>28 | F | 46 | 10/28/2016<br>10/31/2016<br>11/4/2016<br>11/25/2016 | 3<br>6<br>10<br>31 | 9<br>8<br>3<br>2    |

a- Symptom checklist included the following-Back pain, Bleeding, Confusion/disorientation, Conjunctivitis, Difficult standing upright / hunched, Difficulty walking, Fatigue, Headache, Itchiness, Joint ache (severe arthralgia), Malaise, Mouth ulcers, Muscle ache, Muscular weakness, Paresthesias, Periorbital pain, Photophobia, Rash, Sore throat

**Supplementary Table 3: Frequency of antigenic sites for IgM and IgG antibodies in serum on day 0 and 7 and urine on day 7 post -ZIKV exposure.**

| Antigenic Site            | AA        | Sequence                                                                                                                                                                                 | IgM        |            |            | IgG        |            |             |
|---------------------------|-----------|------------------------------------------------------------------------------------------------------------------------------------------------------------------------------------------|------------|------------|------------|------------|------------|-------------|
|                           |           |                                                                                                                                                                                          | Serum D0   | Serum D7   | Urine D7   | Serum D0   | Serum D7   | Urine D7    |
| Z-1 (pr) 122-170          | 122-170   | AAEVTRRGSAYMYLDRNDAGEAISFPTLGMNKCQIYIMDLGHMCDAT                                                                                                                                          | 0%         | 1%         | 1%         | 0%         | 0%         | 0%          |
| Z-2 (pr/M-1) 170-216      | 170-216   | TMSYECPLMDEGEVPEDDVDCVNTTSTWVVYGTCHHHKGEARRSRRRA                                                                                                                                         | 1%         | 1%         | 2%         | 1%         | 0%         | 16%         |
| Z-3 (pr/M-2) 188-293      | 188-293   | DCWCNTTSTWVVYGTCHHHKGEARRSRRAVTLPSHSTRKLRQTSQTWLESREYTKHLIRVENWIFRNP<br>GFALAAAIAWLLGSSTSQKVLYLVMILIAPAYISIRC<br>SRRRAVTLPSHSTRKLRQTSQTVLESREYTKHLIRVENWIFRNPGFALAAAIAWLLGSSTSQKVLYLVMIL | 0%         | 0%         | 0%         | 0%         | 1%         | 0%          |
| Z-4 (M/E) 213-374         | 213-374   | LIAPAYSIRCIQVNRDFVEGMSGGTVWVVDVLEHGCGVTVMADQKPTVDIELVTTTNSMAEVRSYCY<br>EASISDMASDRSCTQGEAYLDK                                                                                            | 0%         | 0%         | 0%         | 1%         | 1%         | 0%          |
| Z-4.1 (E-1) 310-372       | 310-372   | WVDVLEHGGCVTVMAQDKPTVDIELVTTTNSMAEVRSYCYEASISDMASDRSCTQGEAYL                                                                                                                             | 0%         | 1%         | 0%         | 4%         | 1%         | 0%          |
| Z-4.2 (E-2) 365-411       | 365-411   | PTQGEAYLQKQSDTQVCKRKLTVDRVWGNGCFLGKGLVTCAKFAC                                                                                                                                            | 2%         | 1%         | 0%         | 3%         | 2%         | 0%          |
| Z-5 (E-3) 417-526         | 417-526   | GKSIQPENLEYRIMLSVHGSQHSQMIVNDTGHETDENRAKVEITPNSPRAEATLGGFSLGLDCEPRTG<br>LDFSDLYLTMNNKHVLVHKEWFHDIPLPHWAGADGTGPHW                                                                         | 1%         | 0%         | 0%         | 3%         | 0%         | 0%          |
| Z-6 (E-4) 484-535         | 484-535   | TGLDFSDLYLTMNNKHVLVHKEWFHDIPLPHWAGADGTGPHWNNKEALVEF                                                                                                                                      | 3%         | 8%         | 3%         | 4%         | 1%         | 0%          |
| Z-7 (E-5) 558-579         | 558-579   | ALAGALEAEMDGAAGRSLSSGHL                                                                                                                                                                  | 0%         | 0%         | 1%         | 0%         | 0%         | 0%          |
| Z-8 (E-6) 595-729         | 595-729   | YSLCTAAFTFKIPAETHLHGTVTVEVQYAGTDGPKCPVPAQMAVDMQTLTPVGRLLITANPVITESTENSK<br>MMLELDPPFGDSYIVIGVEKKITHHWRHSGSTIGKAFEAATVRGAKRMAVLDGTAWDFGVSFGGALN                                           | 1%         | 0%         | 0%         | 1%         | 16%        | 17%         |
| Z-8.1 (E-7) 657-719       | 657-719   | ESTENSKMMLELDPPFGDSYIVIGVEKKITHHWRHSGSTIGKAFEAATVRGAKRMAVLDGTAW<br>IGVGEKKITHHWRHSGSTIGKAFEAATVRGAKRMAVLDGTAWDFGVSFGGALNSLGGKIHGIFGAFAKSL                                                | 2%         | 1%         | 0%         | 7%         | 1%         | 0%          |
| Z-9 (E-8) 679-794         | 679-806   | FGGMSWFSQILIGLTLMLWGLNLTNGSISLMCLALGGVLFILSTAVSDVGCVSDFSKKE                                                                                                                              | 0%         | 0%         | 2%         | 0%         | 1%         | 0%          |
| Z-10 (NS1-1) 795-835      | 789-835   | STAVSADVGCVSDFSKKTRCGTGVFVYNDVEAWDRYKYPDPSRR                                                                                                                                             | 1%         | 1%         | 1%         | 5%         | 0%         | 0%          |
| Z-11 (NS1-2) 873-913      | 873-913   | LEENGQLTVVGVSKNPMWRGPQRLPVPYNELPHGWKAWG                                                                                                                                                  | 0%         | 1%         | 1%         | 0%         | 1%         | 0%          |
| Z-12 (NS1-3) 958-1023     | 958-1023  | HTSVWLKVRDYSLECDPAVIGTAVKKEAVHSDLYWIESEKNDTWRLKRAHMIEMTKCEWPKSH                                                                                                                          | 2%         | 1%         | 0%         | 0%         | 1%         | 0%          |
| Z-13 (NS1-4) 1031-1090    | 1031-1090 | EESDLIPKSLAGLPSHHNTREGYRTQMKGPDWHEEIEIRFEECPGTQVHVEETCGTRGP                                                                                                                              | 1%         | 1%         | 1%         | 0%         | 0%         | 0%          |
| Z-14 (NS1-5) 1046-1127    | 1046-1127 | SHHNTREGYRTQMKGPDWHEEIEIRFEECPGTQVHVEETCGTRGPSRLRSTTASGRVIEEWCCRECTMPP<br>LSFRAKDGCWYGM                                                                                                  | 0%         | 1%         | 2%         | 5%         | 7%         | 0%          |
| Z-15 (NS2B) 1417-1474     | 1417-1474 | SGKSVDMYIERAGDITWEKDAEVTGNSPRDLVALDESGDFSLVEDDGGPPMREILKVV<br>TICGMNPIAIFAAAGAWYVYKTKRSGALWDVPAPKEVKGETTDGYYRVMTRRLGISTQVGVGM                                                            | 0%         | 1%         | 0%         | 1%         | 49%        | 17%         |
| Z-16 (NS3-1) 1503-1624    | 1477-1624 | QEGVFHTMWHVTKGSLRSGEGRDLYWGDVQKDLVSYCGPWKLDAAWDHGHSEVQLLAVPPGERA<br>RNIQTLPGFIFKTDGD                                                                                                     | 1%         | 0%         | 0%         | 1%         | 0%         | 0%          |
| Z-17 (NS3-2) 1536-1672    | 1536-1672 | TQVGVGMQEGVFHTMWHVTKGSLRSGEGRDLYWGDVQKDLVSYCGPWKLDAAWDHGHSEVQ<br>LLAVPPGERARNIQTLPGFIFKTDGDGIDAVALDYPAGTSGPILDKCGRVIGLVNGVVIKNGSVSAITQ<br>GRR                                            | 3%         | 0%         | 1%         | 1%         | 0%         | 0%          |
| Z-18 (NS3-3) 1600-1694    | 1600-1694 | LAVPPGERARNIQTLPGFIFKTDGDGIDAVALDYPAGTSGPILDKCGRVIGLVNGVVIKNGSVSAITQ<br>RREEETPVECFEPMKKKQLTVL                                                                                           | 1%         | 0%         | 0%         | 1%         | 0%         | 0%          |
| Z-19 (NS3-4) 1792-1877    | 1792-1877 | TDPSIIAARGYSTRVEMGEAAAFMTATPPGTRDAFDSNSPIMDTEVEVPERAWSSGFDWVTDHSG<br>KTVWFVPSVRNGEIAAC                                                                                                   | 7%         | 14%        | 11%        | 7%         | 0%         | 17%         |
| Z-20 (NS3-5) 1910-2027    | 1910-2027 | TTDISEMGANFKADRVIDSRRLKPVLDGERVILAGMPVTHASAAQRRRIGRNPKNKPGDELYLGGG<br>CAETEDHAHWLEARMLLDNLYLDGLIASLYRPEADKVAIEGFKLR                                                                      | 2%         | 3%         | 1%         | 1%         | 0%         | 0%          |
| Z-21 (NS3-6) 2021-2119    | 2021-2136 | EGEFKLRTEQRKTFVELMKRGLDPVWLAYQVASAGITYDRRWCDFGTTNNTIMEDSVPAEAVWTRHG<br>EKRVLKRPMWDARVCSDAHALSKFEKFAAGKRAAFVGMALGTLPGHM                                                                   | 1%         | 0%         | 0%         | 1%         | 1%         | 0%          |
| Z-21.1 (NS3-7) 2028-2111  | 2028-2111 | TEQRKTFVELMKRGLDPVWLAYQVASAGITYDRRWCDFGTTNNTIMEDSVPAEAVWTRHGEKRVLKP<br>RWMMDARVCSDAHALSKF                                                                                                | 1%         | 2%         | 1%         | 1%         | 1%         | 0%          |
| Z-22 (NS4A) 2135-2171     | 2135-2171 | HMTFRFQEAIDLAVLMRAETGSRPYKAAAQLPETL<br>TTFITPAVQHAVTTSYNNYSMLAMATQAGVLFMGKGMPPYAWDFGVPLLMIGCYSLQTLTLVAIL                                                                                 | 1%         | 0%         | 0%         | 0%         | 0%         | 0%          |
| Z-23 (NS4B-1) 2316-2468   | 2316-2468 | LVAHYMYLIPGLQAAAAAQAQRKTAAGIMKNPVVDGIVVTDIDTMTIDPQVEKMGQVLLIAVAVSSA<br>ILSRATAWGWGEAGALI                                                                                                 | 2%         | 0%         | 0%         | 0%         | 1%         | 0%          |
| Z-23.1 (NS4B-2) 2320-2365 | 2320-2365 | TPAVQHAVTTSYNNYSMLAMATQAGVLFMGKGMPPYAWDFGVPLL                                                                                                                                            | 0%         | 0%         | 2%         | 0%         | 0%         | 0%          |
| Z-23.2 (NS4B-3) 2375-2462 | 2375-2462 | PLTLVAVAILLVAHYMYLIPGLQAAAAAQAQRKTAAGIMKNPVVDGIVVTDIDTMTIDPQVEKMGQVLL<br>IAVAVSSALSRTAWGWG                                                                                               | 1%         | 0%         | 1%         | 0%         | 1%         | 0%          |
| Z-24 (NS5-1) 2413-2484    | 2413-2484 | MKNPVVDGIVVTDIDTMTIDPQVEKMGQVLLIAVAVSSALSRTAWGWGEAGALITAASTLWEGSP<br>NKYW                                                                                                                | 1%         | 2%         | 3%         | 0%         | 0%         | 17%         |
| Z-25 (NS5-2) 2525-2608    | 2525-2608 | GETLGEKWKARLNQMSALEFYSSKSGITEVCREARRALKDGVATGGHAVSRGSAKLRWLVERGYLQ<br>PYGVIDLGCGRGGWS                                                                                                    | 1%         | 1%         | 0%         | 0%         | 0%         | 0%          |
| Z-26 (NS5-3) 2609-2665    | 2609-2665 | YYAATIRKQVEVKGYTKGGPGHEEPLVQSYGNVIRLKSQVDVFMMAAEPDCLLCC                                                                                                                                  | 1%         | 0%         | 3%         | 0%         | 0%         | 0%          |
| Z-27 (NS5-4) 2671-2753    | 2671-2753 | SSPEVEEARLRLVLSMVGDWLEKRPAGFCIKLCPYTTMMETLERLQRRYGGGLRVPLSRNSTHEM<br>YVWSGAKSNTIKSV                                                                                                      | 2%         | 0%         | 1%         | 0%         | 1%         | 0%          |
| Z-28 (NS-5) 2736-2829     | 2736-2829 | THEMYWVSGAKSNTIKSVTSTQLLLGRMDGRRPVRKYVEDVNLGSGTRAVVSCAEAPNKKIIGNRIER<br>IRSEHAETWFFDENHPYRTWAYHGS                                                                                        | 2%         | 1%         | 2%         | 1%         | 0%         | 0%          |
| Z-28.1 (NS5-6) 2798-2831  | 2798-2831 | IGNRIERIRSEHAETWFFDENHPYRTWAYHGSYE                                                                                                                                                       | 5%         | 3%         | 2%         | 4%         | 1%         | 0%          |
| Z-29 (NS5-7) 2826-2898    | 2826-2898 | YHGSYEAPTQGSASSLINGVRLSKPVDVVTGTGIAMTDITPYGQQRVFEKVDTRVPDQEGTRQ<br>VMSMV                                                                                                                 | 2%         | 3%         | 6%         | 1%         | 0%         | 0%          |
| Z-30 (NS5-8) 2917-2979    | 2917-2979 | KEEFINKVRSNAALGAIFEEKEWKTAVEAVNDPRFWALVDKEREHHLRGCQSVYNNMMGKR                                                                                                                            | 3%         | 1%         | 2%         | 4%         | 1%         | 0%          |
| Z-31 (NS5-9) 2997-3050    | 2997-3050 | YMWLGARFLEFEALFLNEDHWMGRENSSGGVEGLGLQRLGYLVEEMSRIIPGGR                                                                                                                                   | 2%         | 0%         | 2%         | 0%         | 0%         | 0%          |
| Z-32 (NS5-10) 3029-3174   | 3029-3174 | EGLGLQRLGYLVEEMSRIIPGGRMYADDTAGWDRISRFDELENEALITNQMEKGHRRALALAIKIYTYQNK<br>VVKVLRPAEKGTVMDIISRQDQRSGQVVTYALNTFTNLVQLIRNMEAEVLEMQDLWLLRSEKV<br>TNWLQSNWG                                  | 1%         | 0%         | 1%         | 1%         | 0%         | 0%          |
| Z-32.1 (NS5-11) 3039-3068 | 3039-3068 | VLEEMSRIIPGGRMYADDTAGWDRISRFDL                                                                                                                                                           | 2%         | 1%         | 1%         | 4%         | 0%         | 0%          |
| Z-32.2 (NS5-12) 3104-3168 | 3104-3168 | PAEKGTVMDIISRQDQRSGQVVTYALNTFTNLVQLIRNMEAEVLEMQDLWLLRSEKVTNW<br>SEKVTNLQSNWDRLKRMAVSGDCCVVKPIDRFAHALRFLNDMGKVRKDTQEWKSTGWDNW                                                             | 1%         | 9%         | 2%         | 0%         | 0%         | 16%         |
| Z-33 (NS5-13) 3162-3241   | 3162-3241 | EVPFCSHHFNKLHLK                                                                                                                                                                          | 2%         | 3%         | 0%         | 0%         | 0%         | 0%          |
| Z-33.1 (NS5-14) 3181-3239 | 3181-3239 | AVSGDDCVKPIDRFAHALRFLNDMGKVRKDTQEWKSTGWDNVEEVPFCSHHFNKLH                                                                                                                                 | 2%         | 2%         | 2%         | 4%         | 1%         | 0%          |
| Z-34 (NS5-15) 3241-3275   | 3241-3275 | KDGRSIVVPCRHQDELIGRARVSPGAGWSIRETAC                                                                                                                                                      | 0%         | 0%         | 2%         | 0%         | 0%         | 0%          |
| Z-35 (NS5-16) 3308-3368   | 3308-3368 | DWVPTGRTTWSIHGKEWMTTFEDMLVWVNNRRIEENDHMEKDPVTWKTDIPYLGKREDLW                                                                                                                             | 2%         | 6%         | 6%         | 3%         | 0%         | 0%          |
| Z-36 (NS5-17) 3357-3417   | 3357-3417 | DIPYLGKREDLWCGSLIGHRPRTTWAENIKTVNVRRIIGDEEKYMDYLTQVRYLGEEG                                                                                                                               | 0%         | 1%         | 2%         | 3%         | 1%         | 0%          |
| <b>Total*</b>             |           |                                                                                                                                                                                          | <b>63%</b> | <b>71%</b> | <b>68%</b> | <b>78%</b> | <b>91%</b> | <b>100%</b> |

\* Total percentage of clones are comprised of clones represented in these antigenic sites for the analyzed sample.

The remaining clones are not represented by any unique antigenic site as clonal frequency is less than 2 for all analyzed samples



Supplementary Table 4: Sequence conservation of Antigenic regions/sites among different Flavivirus strains

| Antigenic Site            | AA        | Sequence                                                                                                                                                                                                                                                                                                                                                                                                                                                                                                                                                | Similarity of ZIKV antigenic Sites to other flaviviruses (%) |          |          |          |              |           |
|---------------------------|-----------|---------------------------------------------------------------------------------------------------------------------------------------------------------------------------------------------------------------------------------------------------------------------------------------------------------------------------------------------------------------------------------------------------------------------------------------------------------------------------------------------------------------------------------------------------------|--------------------------------------------------------------|----------|----------|----------|--------------|-----------|
|                           |           |                                                                                                                                                                                                                                                                                                                                                                                                                                                                                                                                                         | Dengue 1                                                     | Dengue 2 | Dengue 3 | Dengue 4 | Yellow Fever | West Nile |
| Z-1 (pr) 122-170          | 122-170   | AAEVTRRRGSAYMYLDRNDAGEAISFPPTLLGMNCKYIIMDLGHMCDA<br>T                                                                                                                                                                                                                                                                                                                                                                                                                                                                                                   | 35%                                                          | 35%      | 39%      | 37%      | 14%          | 29%       |
| Z-2 (pr/M-1) 170-216      | 170-216   | TMSYECPLMDEGVPPDDVDCWCNTTSTWVVYGTCHHKKGEARRSR<br>A<br>DCWCNTTSTWVVYGTCHHKKGEARRSRRAVLPSSHSTRKLQTRSQT                                                                                                                                                                                                                                                                                                                                                                                                                                                    | 62%                                                          | 57%      | 60%      | 57%      | 50%          | 51%       |
| Z-3 (pr/M-2) 188-293      | 188-293   | WLESREYTKHLIRVENWIFRNPGFALAAAIAWLLGSSTSKVIVLVML<br>LIAPAYSIRC<br>SRRAVLTPSHSTRKLQTRSQTWLESREYTKHLIRVENWIFRNPGFALAA                                                                                                                                                                                                                                                                                                                                                                                                                                      | 43%                                                          | 43%      | 43%      | 51%      | 42%          | 47%       |
| Z-4 (M/E) 213-374         | 213-374   | AAIAWLLGSSTSKVIVLVMLLIAPAYSIRCIGVSNRDFVEGMSGTWW<br>DVVLEHGCVTVMAQDKPTVDIELVTTVSNMAEVRSYCYEASISDMA<br>SDSRCTQGEAYLDK                                                                                                                                                                                                                                                                                                                                                                                                                                     | 51%                                                          | 47%      | 49%      | 55%      | 46%          | 51%       |
| Z-4.1 (E-1) 310-372       | 310-372   | WVDVLEHGCVTVMAQDKPTVDIELVTTVSNMAEVRSYCYEASISD<br>MASDSRCTQGEAYL                                                                                                                                                                                                                                                                                                                                                                                                                                                                                         | 68%                                                          | 55%      | 62%      | 65%      | 48%          | 52%       |
| Z-4.2 (E-2) 365-411       | 365-411   | PTQGEAYLQKQSDTQYVCKRTRLVDRGWNGCGLFGKGLVTCAKFAC<br>GKSIQPENLEYRIMLSVHGSQHSQSMIVNDTGHETDENRAKVEITPNSPR                                                                                                                                                                                                                                                                                                                                                                                                                                                    | 77%                                                          | 66%      | 79%      | 72%      | 64%          | 70%       |
| Z-5 (E-3) 417-526         | 417-526   | AEATLGGFGSLGLDCEPRTGLDFSDLYLTMNNKHVWVHKEWFHDIPL<br>PWHAGADTTPHW                                                                                                                                                                                                                                                                                                                                                                                                                                                                                         | 47%                                                          | 47%      | 48%      | 46%      | 22%          | 35%       |
| Z-6 (E-4) 484-535         | 484-535   | TGLDFSDLYLTMNNKHVWVHKEWFHDIPLPWHAGADTTPHWNNKE<br>ALVEF                                                                                                                                                                                                                                                                                                                                                                                                                                                                                                  | 56%                                                          | 58%      | 62%      | 56%      | 35%          | 42%       |
| Z-7 (E-5) 558-579         | 558-579   | ALAGALEAMDGAKGRLLSSGHL<br>YSLCTAAFTFKIPAEHLHGTVTVEVQYAGTDPGCKVPAQMAVDMQTLT                                                                                                                                                                                                                                                                                                                                                                                                                                                                              | 41%                                                          | 45%      | 41%      | 41%      | 32%          | 50%       |
| Z-8 (E-6) 595-729         | 595-729   | PVGRLLITANPVITESTENSKMMLDPPFGDSYIVIGVEKITHHWHRS<br>GSTIGKAFATVRGAKRMAVLGDTAWDFGSGVGGALN<br>ESTENSKMMLDPPFGDSYIVIGVEKITHHWHRSSTIGKAFATV<br>RGAKRMAVLGDTAW                                                                                                                                                                                                                                                                                                                                                                                                | 55%                                                          | 52%      | 53%      | 54%      | 42%          | 62%       |
| Z-8.1 (E-7) 657-719       | 657-719   | IGVGEKITHHWHRSSTIGKAFATVRGAKRMAVLGDTAWDFGSGV<br>GALNSLKGKIHQIFGAFAKSLFGGMSWFSQILGTLMLWGLNKNKGSIS<br>LMCLALGGVILFLSTAVSADVGCSVDFSKKE                                                                                                                                                                                                                                                                                                                                                                                                                     | 55%                                                          | 48%      | 57%      | 56%      | 48%          | 62%       |
| Z-10 (NS1-1) 795-835      | 789-835   | STAVSADVGCSVDFSKKTRCGTVFVYNDVEAWRDRYKYHPDSPRR                                                                                                                                                                                                                                                                                                                                                                                                                                                                                                           | 43%                                                          | 40%      | 45%      | 45%      | 40%          | 55%       |
| Z-11 (NS1-2) 873-913      | 873-913   | LEENGVLQTVVGVSKNPMWRGPQRLPVPVNLPHGKAWG<br>HTSVWLKVRDYSLCEDPAVIGTAVKGEAVHSDLYWIESEKNDTW                                                                                                                                                                                                                                                                                                                                                                                                                                                                  | 37%                                                          | 41%      | 41%      | 46%      | 41%          | 46%       |
| Z-12 (NS1-3) 958-1023     | 958-1023  | RLKRAHLIEMKTCWPKSH<br>EESDLIIPKSLAGPLSHHNTREGYRTQMKGPWHSEELIRFECEPGTKV<br>HVEETCGTRGP                                                                                                                                                                                                                                                                                                                                                                                                                                                                   | 58%                                                          | 50%      | 58%      | 53%      | 34%          | 58%       |
| Z-13 (NS1-4) 1031-1090    | 1031-1090 | SHHNTREGYRTQMKGPWHSEELIRFECEPGTKVHVEETCGTRGPSL<br>RSTTASGRVIEEWCCRECTMPPLSFRAKDDGCGWYM                                                                                                                                                                                                                                                                                                                                                                                                                                                                  | 62%                                                          | 65%      | 62%      | 65%      | 57%          | 55%       |
| Z-14 (NS1-5) 1046-1127    | 1046-1127 | SGKSVDMYIEIAGDITWEKDAEVTGNSPRLDVALDESGDFSLVEDDGP<br>PMREILKVV<br>TICGMNPIAIPFAAGAWYVYVKTGKRSALWVDPAPKEVKKGETTDGV<br>YRVMTRRLGSLGTQVGVGMQEGVFHTMWHVTGKSALRSSEGRLDPY<br>WGDVQKDLVSYCGPWKLDAAWDGHSEVQLLAVPPGERARNIOTLPGI<br>FKTKDGD<br>TQVGVGMQEGVFHTMWHVTGKSALRSSEGRLDPYWGDVQKDLVSY                                                                                                                                                                                                                                                                       | 29%                                                          | 33%      | 34%      | 34%      | 31%          | 55%       |
| Z-15 (NS2B) 1417-1474     | 1417-1474 | TICGMNPIAIPFAAGAWYVYVKTGKRSALWVDPAPKEVKKGETTDGV<br>YRVMTRRLGSLGTQVGVGMQEGVFHTMWHVTGKSALRSSEGRLDPY<br>WGDVQKDLVSYCGPWKLDAAWDGHSEVQLLAVPPGERARNIOTLPGI<br>FKTKDGD                                                                                                                                                                                                                                                                                                                                                                                         | 51%                                                          | 49%      | 49%      | 51%      | 44%          | 60%       |
| Z-16 (NS3-1) 1503-1624    | 1477-1624 | TQVGVGMQEGVFHTMWHVTGKSALRSSEGRLDPYWGDVQKDLVSY<br>CGPWKLDAAWDGHSEVQLLAVPPGERARNIOTLPGIFIKTKDGDIGAVA<br>LDYPAGTSGSPILDKCGRVIGLYNGVVIKNGSVYSAITQGRR<br>LAVPPGERARNIOTLPGIFIKTKDGDIGAVADLTPAGTSGSPILDKCGRVI<br>GLYNGVVIKNGSVYSAITQGRREETPVECFEFSMLKQLLTVL<br>TDPSSIAARGYISTRVEMGEAAIFMTATPPTGTRDAFDSNSPIMDTEV<br>EVPERAWSSGFWDVTDHSGKTVWFVSVRNGNEIAAC<br>TTDISEMGANFKADRVIDSRRLKPVLDGERVILAGPMPVTHASAAQR<br>RGRIGRNPKNKPGDELYGGGCAETDEDAHWAARMLLDNILQDGLI<br>ASLYRPEADKVAIEGFKLR<br>EGEFKLRTEQRKTFVELMKRGLPVVLAQYASAGITYTDRRWCFDG<br>EAGKRGAAFGVMEALGTLPGHM | 56%                                                          | 58%      | 59%      | 60%      | 57%          | 58%       |
| Z-17 (NS3-2) 1536-1672    | 1536-1672 | CGPWKLDAAWDGHSEVQLLAVPPGERARNIOTLPGIFIKTKDGDIGAVA<br>LDYPAGTSGSPILDKCGRVIGLYNGVVIKNGSVYSAITQGRR<br>LAVPPGERARNIOTLPGIFIKTKDGDIGAVADLTPAGTSGSPILDKCGRVI<br>GLYNGVVIKNGSVYSAITQGRREETPVECFEFSMLKQLLTVL<br>TDPSSIAARGYISTRVEMGEAAIFMTATPPTGTRDAFDSNSPIMDTEV<br>EVPERAWSSGFWDVTDHSGKTVWFVSVRNGNEIAAC<br>TTDISEMGANFKADRVIDSRRLKPVLDGERVILAGPMPVTHASAAQR<br>RGRIGRNPKNKPGDELYGGGCAETDEDAHWAARMLLDNILQDGLI<br>ASLYRPEADKVAIEGFKLR<br>EGEFKLRTEQRKTFVELMKRGLPVVLAQYASAGITYTDRRWCFDG<br>EAGKRGAAFGVMEALGTLPGHM                                                  | 49%                                                          | 53%      | 54%      | 55%      | 55%          | 65%       |
| Z-18 (NS3-3) 1600-1694    | 1600-1694 | TDPSSIAARGYISTRVEMGEAAIFMTATPPTGTRDAFDSNSPIMDTEV<br>EVPERAWSSGFWDVTDHSGKTVWFVSVRNGNEIAAC<br>TTDISEMGANFKADRVIDSRRLKPVLDGERVILAGPMPVTHASAAQR<br>RGRIGRNPKNKPGDELYGGGCAETDEDAHWAARMLLDNILQDGLI<br>ASLYRPEADKVAIEGFKLR<br>EGEFKLRTEQRKTFVELMKRGLPVVLAQYASAGITYTDRRWCFDG<br>EAGKRGAAFGVMEALGTLPGHM                                                                                                                                                                                                                                                          | 72%                                                          | 77%      | 74%      | 77%      | 48%          | 71%       |
| Z-19 (NS3-4) 1792-1877    | 1792-1877 | TTDISEMGANFKADRVIDSRRLKPVLDGERVILAGPMPVTHASAAQR<br>RGRIGRNPKNKPGDELYGGGCAETDEDAHWAARMLLDNILQDGLI<br>ASLYRPEADKVAIEGFKLR<br>EGEFKLRTEQRKTFVELMKRGLPVVLAQYASAGITYTDRRWCFDG<br>EAGKRGAAFGVMEALGTLPGHM                                                                                                                                                                                                                                                                                                                                                      | 73%                                                          | 71%      | 71%      | 70%      | 49%          | 63%       |
| Z-20 (NS3-5) 1910-2027    | 1910-2027 | TTNNTIMEDSVPAEVWTRHGEKRVLKRPRWMDARVCSDAHALKSFKEF<br>AAGKRGAAFGVMEALGTLPGHM                                                                                                                                                                                                                                                                                                                                                                                                                                                                              | 57%                                                          | 60%      | 58%      | 59%      | 47%          | 59%       |
| Z-21 (NS3-6) 2021-2119    | 2021-2136 | TEQRKTFVELMKRGLPVVLAQYASAGITYTDRRWCFDGTNTNNTIME<br>DSVPAEAWTRHGEKRVLKRPRWMDARVCSDAHALKSF                                                                                                                                                                                                                                                                                                                                                                                                                                                                | 43%                                                          | 54%      | 43%      | 38%      | 32%          | 35%       |
| Z-21.1 (NS3-7) 2028-2111  | 2028-2111 | TEQRKTFVELMKRGLPVVLAQYASAGITYTDRRWCFDGTNTNNTIME<br>DSVPAEAWTRHGEKRVLKRPRWMDARVCSDAHALKSF                                                                                                                                                                                                                                                                                                                                                                                                                                                                | 43%                                                          | 54%      | 43%      | 38%      | 32%          | 35%       |
| Z-22 (NS4A) 2135-2171     | 2135-2171 | HMTERFOEAINDLAVLMAEATGSRPYKAAAQLPETL<br>TTFITPAVQHAVTTSYNNYSMLMAMATQAGVLFMGKGMFPFYAWDFGV<br>PLLMIGCYSQTLPLTLVAILLVAHYMYLPLGLQAAAARAQKRTAAGIMK<br>NPVVDGIVTIDTMTIDPQVEKMGQVLLIAVAVSSAILSRATAWGWGE<br>AGALI                                                                                                                                                                                                                                                                                                                                               | 52%                                                          | 55%      | 52%      | 50%      | 31%          | 42%       |
| Z-23 (NS4B-1) 2316-2468   | 2316-2468 | TTFITPAVQHAVTTSYNNYSMLMAMATQAGVLFMGKGMFPFYAWDFGV<br>PLLMIGCYSQTLPLTLVAILLVAHYMYLPLGLQAAAARAQKRTAAGIMK<br>NPVVDGIVTIDTMTIDPQVEKMGQVLLIAVAVSSAILSRATAWGWGE<br>AGALI                                                                                                                                                                                                                                                                                                                                                                                       | 47%                                                          | 49%      | 47%      | 44%      | 34%          | 42%       |
| Z-23.1 (NS4B-2) 2320-2365 | 2320-2365 | TPAVQHAVTTSYNNYSMLMAMATQAGVLFMGKGMFPFYAWDFGVPLL<br>PLTLVAILLVAHYMYLPLGLQAAAARAQKRTAAGIMKNPVVDGIVTID<br>DTMTIDPQVEKMGQVLLIAVAVSSAILSRATAWGWG                                                                                                                                                                                                                                                                                                                                                                                                             | 46%                                                          | 52%      | 50%      | 50%      | 37%          | 37%       |
| Z-23.2 (NS4B-3) 2375-2462 | 2375-2462 | PLTLVAILLVAHYMYLPLGLQAAAARAQKRTAAGIMKNPVVDGIVTID<br>DTMTIDPQVEKMGQVLLIAVAVSSAILSRATAWGWG                                                                                                                                                                                                                                                                                                                                                                                                                                                                | 55%                                                          | 55%      | 52%      | 50%      | 30%          | 44%       |
| Z-24 (NS5-1) 2413-2484    | 2413-2484 | MKNPVVDGIVTIDTMTIDPQVEKMGQVLLIAVAVSSAILSRATAWGW<br>GEAGALITAAATSTLWEGSPNKYYW                                                                                                                                                                                                                                                                                                                                                                                                                                                                            | 47%                                                          | 49%      | 47%      | 44%      | 34%          | 42%       |
| Z-25 (NS5-2) 2525-2608    | 2525-2608 | GETLGEKWKARLNQMSALEFYSYKKSIGTEVCREARRALKDGVATG<br>GHAIVSRGSAKRLWLVREYGLQPYGKVIDLGCGRGGWS                                                                                                                                                                                                                                                                                                                                                                                                                                                                | 69%                                                          | 67%      | 70%      | 67%      | 57%          | 64%       |
| Z-26 (NS5-3) 2609-2665    | 2609-2665 | YAAATIRKQVEVKGYTKGGPGHEEPVLVQSYGNVIRLKSQGVDFHMA<br>AEPDCLL                                                                                                                                                                                                                                                                                                                                                                                                                                                                                              | 67%                                                          | 65%      | 69%      | 67%      | 51%          | 77%       |
| Z-27 (NS5-4) 2671-2753    | 2671-2753 | SSSPEVEEARTLRLVSMVGDWLEKRPAGFCIKVLCPTYSTMMETLERL<br>QRRYGGGLVLRVPLSRNSTHEMYVWVSGAKSNITKSV<br>THEMYVWVSGAKSNITKSVSTTSQLLGRMDGRRPVPKYEEDVNLGSG<br>TRAVVSCAEAPNMKIIGNRIERIRSEHAETWFFDENHPYRTWAYHGS                                                                                                                                                                                                                                                                                                                                                         | 58%                                                          | 60%      | 63%      | 66%      | 57%          | 69%       |
| Z-28 (NS-5) 2736-2829     | 2736-2829 | THEMYVWVSGAKSNITKSVSTTSQLLGRMDGRRPVPKYEEDVNLGSG<br>TRAVVSCAEAPNMKIIGNRIERIRSEHAETWFFDENHPYRTWAYHGS                                                                                                                                                                                                                                                                                                                                                                                                                                                      | 53%                                                          | 52%      | 52%      | 57%      | 49%          | 57%       |
| Z-28.1 (NS5-6) 2798-2831  | 2798-2831 | IGNRIERIRSEHAETWFFDENHPYRTWAYHGSYE                                                                                                                                                                                                                                                                                                                                                                                                                                                                                                                      | 68%                                                          | 65%      | 65%      | 65%      | 56%          | 68%       |
| Z-29 (NS5-7) 2826-2898    | 2826-2898 | YHGSYEAPTGSSASSLINGVRLLSKPVVDVVTGVTGIAMDTTPYGGQ<br>RVFKEKVDTRVPDQEGTRQVMSMV                                                                                                                                                                                                                                                                                                                                                                                                                                                                             | 70%                                                          | 70%      | 71%      | 73%      | 62%          | 70%       |
| Z-30 (NS5-8) 2917-2979    | 2917-2979 | KEEFINKVRSNAALGAIFEEKEKWTAVEAVNDRPFVWLDKEREHHL<br>RGECQSCVYNNMMGKR                                                                                                                                                                                                                                                                                                                                                                                                                                                                                      | 63%                                                          | 71%      | 63%      | 71%      | 68%          | 71%       |
| Z-31 (NS5-9) 2997-3050    | 2997-3050 | YMWLGARFLEFALGFLNEDHWMGRENSGGGVEGLGLQRLGYVLEE<br>MSRIPGGR                                                                                                                                                                                                                                                                                                                                                                                                                                                                                               | 74%                                                          | 72%      | 74%      | 76%      | 74%          | 80%       |
| Z-32 (NS5-10) 3029-3174   | 3029-3174 | EGLGLQRLGYVLEEMSRIPGGRMYADDTAGWDTRISRFDL<br>QMEKGRHALALAIKYYQNKVVKVLRPAEKGKTVMDSRQDRGSGGQ<br>VVTYALNTFTNLVQLIRNMEAEEVLEMQDLWLLRSEKVTNWLQSNQ<br>W                                                                                                                                                                                                                                                                                                                                                                                                        | 60%                                                          | 60%      | 62%      | 62%      | 57%          | 62%       |
| Z-32.1 (NS5-11) 3039-3068 | 3039-3068 | VLEEMSRIPGGRMYADDTAGWDTRISRFDL                                                                                                                                                                                                                                                                                                                                                                                                                                                                                                                          | 70%                                                          | 63%      | 70%      | 63%      | 57%          | 63%       |
| Z-32.2 (NS5-12) 3104-3168 | 3104-3168 | PAEKGKTVMDSRQDRGSGGQVVTYALNTFTNLVQLIRNMEAEEVLE<br>MQDLWLLRSEKVTNW                                                                                                                                                                                                                                                                                                                                                                                                                                                                                       | 52%                                                          | 58%      | 54%      | 55%      | 58%          | 64%       |
| Z-33 (NS5-13) 3162-3241   | 3162-3241 | SEKVTNWQLQSNQWDRLKRMAVSGDDCVKPIDDRFAHALRFLNDMG<br>KVRKDTQEWKPKSTGWDNWEVFPFCSHFHKLHLK<br>AVSGDDCVKPIDDRFAHALRFLNDMGKVRKDTQEWKPKSTGWDNWE<br>EVPFCSHFHKLHL                                                                                                                                                                                                                                                                                                                                                                                                 | 68%                                                          | 65%      | 68%      | 65%      | 66%          | 67%       |
| Z-33.1 (NS5-14) 3181-3239 | 3181-3239 | SEKVTNWQLQSNQWDRLKRMAVSGDDCVKPIDDRFAHALRFLNDMG<br>KVRKDTQEWKPKSTGWDNWEVFPFCSHFHKLHLK                                                                                                                                                                                                                                                                                                                                                                                                                                                                    | 73%                                                          | 71%      | 73%      | 71%      | 71%          | 75%       |
| Z-34 (NS5-15) 3241-3275   | 3241-3275 | KDGRSIVPCRHQDELIGRARVSPGAGWSIRETAC<br>DWVPTGRTTVSIHGKGEWMTTMDMLVWVNRVWIEENDHMDKTPVT<br>KWTIDIPYLGKREDLW                                                                                                                                                                                                                                                                                                                                                                                                                                                 | 86%                                                          | 83%      | 83%      | 86%      | 83%          | 80%       |
| Z-35 (NS5-16) 3308-3368   | 3308-3368 | DWVPTGRTTVSIHGKGEWMTTMDMLVWVNRVWIEENDHMDKTPVT<br>KWTIDIPYLGKREDLW                                                                                                                                                                                                                                                                                                                                                                                                                                                                                       | 77%                                                          | 79%      | 77%      | 75%      | 75%          | 81%       |
| Z-36 (NS5-17) 3357-3417   | 3357-3417 | DIPYLGKREDLWCGSLIGHRPRTTWAENIKNTVMVRRIGDEEKYMDY<br>LSTQVRYLGEEG                                                                                                                                                                                                                                                                                                                                                                                                                                                                                         | 54%                                                          | 57%      | 52%      | 57%      | 46%          | 57%       |
